# Supplementary material for: Identification of potential cervical cancer serum biomarkers in Thai patients
Source: PubMed Central journal article supplement — Oncol Lett. 2020 Apr 7;19(6):3815–26. doi: 10.3892/ol.2020.11519 (PMC7204490; doi:10.3892/ol.2020.11519), 2020-04-07
Supplement: Supplementary_Data.pdf [file Supplementary_Data.pdf]

Table SI. List of proteins identified by liquid chromatography with tandem mass spectrometry identified proteins with score  $\geq 35$  in bound fractions.

| Entry names | Protein names                                                          | MW, Da | pI    | Protein score | Peptide matches | Unique sequences |
|-------------|------------------------------------------------------------------------|--------|-------|---------------|-----------------|------------------|
| MICA1_HUMAN | [F-actin]-monooxygenase MICAL1                                         | 117875 | 6.00  | 41            | 1               | 1                |
| 1433S_HUMAN | 14-3-3 protein sigma                                                   | 27757  | 4.68  | 51            | 1               | 1                |
| FYV1_HUMAN  | 1-phosphatidylinositol 3-phosphate 5-kinase                            | 236986 | 6.24  | 38            | 1               | 1                |
| RT22_HUMAN  | 28S ribosomal protein S22, mitochondrial                               | 41254  | 7.70  | 38            | 1               | 1                |
| CGT_HUMAN   | 2-hydroxyacylsphingosine 1-beta-galactosyltransferase                  | 61398  | 9.54  | 67            | 2               | 1                |
| RM50_HUMAN  | 39S ribosomal protein L50, mitochondrial                               | 18313  | 7.73  | 38            | 1               | 1                |
| NSUN4_HUMAN | 5-methylcytosine rRNA methyltransferase NSUN4                          | 43061  | 8.47  | 39            | 1               | 1                |
| RL7A_HUMAN  | 60S ribosomal protein L7a                                              | 29977  | 10.61 | 37            | 1               | 1                |
| ACTA_HUMAN  | Actin, aortic smooth muscle                                            | 41982  | 5.24  | 40            | 1               | 1                |
| ACTH_HUMAN  | Actin, gamma-enteric smooth muscle                                     | 41850  | 5.31  | 42            | 1               | 1                |
| PPBT_HUMAN  | Alkaline phosphatase, tissue-nonspecific isozyme                       | 57269  | 6.19  | 36            | 1               | 1                |
| A1AG1_HUMAN | Alpha-1-acid glycoprotein 1                                            | 23497  | 4.93  | 291           | 9               | 5                |
| A1AG2_HUMAN | Alpha-1-acid glycoprotein 2                                            | 23588  | 5.03  | 173           | 7               | 4                |
| A1AT_HUMAN  | Alpha-1-antitrypsin                                                    | 46707  | 5.37  | 947           | 29              | 17               |
| FETUA_HUMAN | Alpha-2-HS-glycoprotein                                                | 39300  | 5.43  | 41            | 1               | 1                |
| A2MG_HUMAN  | Alpha-2-macroglobulin                                                  | 163188 | 6.03  | 4359          | 136             | 51               |
| AASS_HUMAN  | Alpha-aminoadipic semialdehyde synthase, mitochondrial                 | 102066 | 6.18  | 37            | 1               | 1                |
| RAI14_HUMAN | Ankycorbin                                                             | 109973 | 5.87  | 38            | 1               | 1                |
| AKIB1_HUMAN | Ankyrin repeat and IBR domain-containing protein 1                     | 121924 | 4.98  | 40            | 1               | 1                |
| ASB2_HUMAN  | Ankyrin repeat and SOCS box protein 2                                  | 65084  | 7.55  | 36            | 1               | 1                |
| ASB8_HUMAN  | Ankyrin repeat and SOCS box protein 8                                  | 31622  | 5.56  | 36            | 1               | 1                |
| AN13C_HUMAN | Ankyrin repeat domain-containing protein 13C                           | 60780  | 6.46  | 35            | 1               | 1                |
| ANT3_HUMAN  | Antithrombin-III                                                       | 52569  | 6.32  | 46            | 2               | 1                |
| APOA1_HUMAN | Apolipoprotein A-I                                                     | 30759  | 5.56  | 1650          | 53              | 18               |
| APOA2_HUMAN | Apolipoprotein A-II                                                    | 11168  | 6.27  | 301           | 12              | 4                |
| APOB_HUMAN  | Apolipoprotein B-100                                                   | 515283 | 6.58  | 51            | 1               | 1                |
| APOC1_HUMAN | Apolipoprotein C-I                                                     | 9326   | 8.01  | 124           | 5               | 4                |
| APOC2_HUMAN | Apolipoprotein C-II                                                    | 11277  | 4.64  | 85            | 2               | 2                |
| APOC3_HUMAN | Apolipoprotein C-III                                                   | 10846  | 5.23  | 104           | 1               | 1                |
| APOD_HUMAN  | Apolipoprotein D                                                       | 21262  | 5.06  | 93            | 3               | 2                |
| APOE_HUMAN  | Apolipoprotein E                                                       | 36132  | 5.65  | 228           | 9               | 7                |
| APOM_HUMAN  | Apolipoprotein M                                                       | 21239  | 5.66  | 37            | 1               | 1                |
| APOA_HUMAN  | Apolipoprotein(a)                                                      | 500995 | 5.58  | 58            | 1               | 1                |
| ASAP2_HUMAN | Arf-GAP with SH3 domain, ANK repeat and PH domain-containing protein 2 | 111581 | 6.24  | 53            | 4               | 1                |
| ABCA3_HUMAN | ATP-binding cassette sub-family A member 3                             | 191362 | 7.55  | 41            | 1               | 1                |
| ABCCB_HUMAN | ATP-binding cassette sub-family C member 11                            | 154202 | 8.39  | 47            | 2               | 1                |
| DHX9_HUMAN  | ATP-dependent RNA helicase A                                           | 140869 | 6.41  | 36            | 1               | 1                |
| ARID2_HUMAN | AT-rich interactive domain-containing protein 2                        | 197391 | 7.08  | 36            | 1               | 1                |
| E41L3_HUMAN | Band 4.1-like protein 3                                                | 120603 | 5.09  | 40            | 3               | 1                |
| CRBG1_HUMAN | Beta/gamma crystallin domain-containing protein 1                      | 188558 | 5.61  | 52            | 2               | 1                |
| HEXB_HUMAN  | Beta-hexosaminidase subunit beta                                       | 63111  | 6.29  | 40            | 1               | 1                |
| PUR9_HUMAN  | Bifunctional purine biosynthesis protein PURH                          | 64616  | 6.27  | 46            | 1               | 1                |
| BARD1_HUMAN | BRCA1-associated RING domain protein 1                                 | 86593  | 8.99  | 45            | 2               | 1                |
| BRCA2_HUMAN | Breast cancer type 2 susceptibility protein                            | 383963 | 6.29  | 48            | 2               | 1                |
| BCAS1_HUMAN | Breast carcinoma-amplified sequence 1                                  | 61671  | 4.99  | 46            | 2               | 1                |
| BRD1_HUMAN  | Bromodomain-containing protein 1                                       | 119520 | 8.91  | 35            | 1               | 1                |
| KCD18_HUMAN | BTB/POZ domain-containing protein KCTD18                               | 46710  | 9.23  | 39            | 1               | 1                |
| BUD13_HUMAN | BUD13 homolog                                                          | 70478  | 9.86  | 37            | 1               | 1                |
| C4BPA_HUMAN | C4b-binding protein alpha chain                                        | 66989  | 7.15  | 146           | 5               | 4                |

Table SI. Continued.

| Entry names | Protein names                                       | MW, Da | pI   | Protein score | Peptide matches | Unique sequences |
|-------------|-----------------------------------------------------|--------|------|---------------|-----------------|------------------|
| CAPS1_HUMAN | Calcium-dependent secretion activator 1             | 152690 | 5.50 | 41            | 1               | 1                |
| CAMP2_HUMAN | Calmodulin-regulated spectrin-associated protein 2  | 168089 | 6.36 | 36            | 1               | 1                |
| CAN8_HUMAN  | Calpain-8                                           | 79144  | 5.10 | 43            | 1               | 1                |
| CASS4_HUMAN | Cas scaffolding protein family member 4             | 87090  | 6.66 | 35            | 1               | 1                |
| CASPE_HUMAN | Caspase-14                                          | 27662  | 5.44 | 79            | 1               | 1                |
| CD5L_HUMAN  | CD5 antigen-like                                    | 38063  | 5.28 | 51            | 1               | 1                |
| CEIP2_HUMAN | Cell surface hyaluronidase                          | 154276 | 8.41 | 43            | 2               | 1                |
| CENPE_HUMAN | Centromere-associated protein E                     | 316219 | 5.51 | 40            | 2               | 1                |
| CP250_HUMAN | Centrosome-associated protein CEP250                | 280967 | 5.00 | 38            | 1               | 1                |
| CERU_HUMAN  | Ceruloplasmin                                       | 122128 | 5.44 | 62            | 1               | 1                |
| CFA54_HUMAN | Cilia- and flagella-associated protein 54           | 351744 | 8.41 | 39            | 1               | 1                |
| CFA61_HUMAN | Cilia- and flagella-associated protein 61           | 141258 | 5.76 | 46            | 2               | 1                |
| CATIP_HUMAN | Ciliogenesis-associated TTC17-interacting protein   | 43872  | 5.28 | 38            | 1               | 1                |
| CLH2_HUMAN  | Clathrin heavy chain 2                              | 186910 | 5.57 | 39            | 1               | 1                |
| CC183_HUMAN | Coiled-coil domain-containing protein 183           | 62689  | 8.93 | 35            | 1               | 1                |
| CCD78_HUMAN | Coiled-coil domain-containing protein 78            | 48521  | 8.27 | 37            | 1               | 1                |
| CO5A2_HUMAN | Collagen alpha-2(V) chain                           | 144821 | 6.07 | 35            | 1               | 1                |
| C1S_HUMAN   | Complement C1s subcomponent                         | 76635  | 4.85 | 38            | 1               | 1                |
| CO3_HUMAN   | Complement C3                                       | 187030 | 6.02 | 5949          | 189             | 64               |
| CO4A_HUMAN  | Complement C4-A                                     | 192664 | 6.66 | 161           | 4               | 3                |
| CO4B_HUMAN  | Complement C4-B                                     | 192631 | 6.89 | 190           | 6               | 5                |
| CO5_HUMAN   | Complement C5                                       | 188305 | 6.11 | 37            | 1               | 1                |
| CFAH_HUMAN  | Complement factor H                                 | 139005 | 6.21 | 43            | 1               | 1                |
| FHR3_HUMAN  | Complement factor H-related protein 3               | 37299  | 7.72 | 43            | 1               | 1                |
| CYTS_HUMAN  | Cystatin-S                                          | 16204  | 4.95 | 66            | 1               | 1                |
| NCK2_HUMAN  | Cytoplasmic protein NCK2                            | 42915  | 6.49 | 47            | 4               | 1                |
| CBPC3_HUMAN | Cytosolic carboxypeptidase 3                        | 115938 | 8.98 | 38            | 1               | 1                |
| DACT1_HUMAN | Dapper homolog 1                                    | 90174  | 8.93 | 36            | 1               | 1                |
| BDH_HUMAN   | D-beta-hydroxybutyrate dehydrogenase, mitochondrial | 38132  | 9.10 | 39            | 1               | 1                |
| DCD_HUMAN   | Dermeidin                                           | 11277  | 6.09 | 105           | 2               | 2                |
| DESP_HUMAN  | Desmoplakin                                         | 331569 | 6.44 | 191           | 10              | 10               |
| VCIP1_HUMAN | Deubiquitinating protein VCIP135                    | 134321 | 6.77 | 37            | 1               | 1                |
| DIP2A_HUMAN | Disco-interacting protein 2 homolog A               | 170261 | 8.35 | 42            | 1               | 1                |
| DAAM2_HUMAN | Disheveled-associated activator of morphogenesis 2  | 123420 | 6.36 | 40            | 1               | 1                |
| DISC1_HUMAN | Disrupted in schizophrenia 1 protein                | 93552  | 5.96 | 36            | 1               | 1                |
| CHFR_HUMAN  | E3 ubiquitin-protein ligase CHFR                    | 73386  | 5.71 | 36            | 1               | 1                |
| HECD3_HUMAN | E3 ubiquitin-protein ligase HECTD3                  | 97051  | 5.46 | 43            | 2               | 1                |
| HERC2_HUMAN | E3 ubiquitin-protein ligase HERC2                   | 526895 | 5.88 | 36            | 1               | 1                |
| RN149_HUMAN | E3 ubiquitin-protein ligase RNF149                  | 43137  | 6.08 | 38            | 1               | 1                |
| ELP3_HUMAN  | Elongator complex protein 3                         | 62219  | 9.04 | 37            | 1               | 1                |
| EMIL2_HUMAN | EMILIN-2                                            | 115687 | 6.04 | 36            | 1               | 1                |
| IF4G3_HUMAN | Eukaryotic translation initiation factor 4 gamma 3  | 176542 | 5.27 | 48            | 1               | 1                |
| XPO2_HUMAN  | Exportin-2                                          | 110346 | 5.51 | 40            | 1               | 1                |
| FAKD4_HUMAN | FAST kinase domain-containing protein 4             | 70693  | 6.98 | 35            | 1               | 1                |
| FCHO2_HUMAN | F-BAR domain only protein 2                         | 88924  | 6.42 | 38            | 2               | 1                |
| FR1L6_HUMAN | Fer-1-like protein 6                                | 209308 | 5.98 | 38            | 1               | 1                |
| FRPD1_HUMAN | FERM and PDZ domain-containing protein 1            | 173437 | 5.14 | 40            | 1               | 1                |
| FINC_HUMAN  | Fibronectin                                         | 262460 | 5.46 | 53            | 1               | 1                |
| FILA_HUMAN  | Filaggrin                                           | 434922 | 9.24 | 59            | 1               | 1                |
| FILA2_HUMAN | Filaggrin-2                                         | 247928 | 8.45 | 49            | 1               | 1                |

Table SI. Continued.

| Entry names | Protein names                                            | MW, Da | pI    | Protein score | Peptide matches | Unique sequences |
|-------------|----------------------------------------------------------|--------|-------|---------------|-----------------|------------------|
| FLNC_HUMAN  | Filamin-C                                                | 291022 | 5.65  | 38            | 1               | 1                |
| FOXP1_HUMAN | Forkhead box protein P1                                  | 75317  | 6.19  | 35            | 1               | 1                |
| G3ST3_HUMAN | Galactose-3-O-sulfotransferase 3                         | 48925  | 9.96  | 35            | 1               | 1                |
| LG3BP_HUMAN | Galectin-3-binding protein                               | 65289  | 5.12  | 70            | 2               | 2                |
| LEG7_HUMAN  | Galectin-7                                               | 15066  | 7.02  | 96            | 1               | 1                |
| GHDC_HUMAN  | GH3 domain-containing protein                            | 57523  | 8.05  | 41            | 2               | 1                |
| GFAP_HUMAN  | Glial fibrillary acidic protein                          | 49850  | 5.42  | 70            | 1               | 1                |
| G3P_HUMAN   | Glyceraldehyde-3-phosphate dehydrogenase                 | 36030  | 8.57  | 54            | 1               | 1                |
| GGYF1_HUMAN | GRB10-interacting GYF protein 1                          | 114531 | 5.30  | 40            | 2               | 1                |
| HPT_HUMAN   | Haptoglobin                                              | 45177  | 6.13  | 781           | 29              | 13               |
| HPTR_HUMAN  | Haptoglobin-related protein                              | 39005  | 6.63  | 589           | 25              | 8                |
| HEMGN_HUMAN | Hemogen                                                  | 55307  | 4.82  | 38            | 1               | 1                |
| HBA_HUMAN   | Hemoglobin subunit alpha                                 | 15248  | 8.72  | 220           | 6               | 4                |
| HBB_HUMAN   | Hemoglobin subunit beta                                  | 15988  | 6.74  | 613           | 17              | 9                |
| HBD_HUMAN   | Hemoglobin subunit delta                                 | 16045  | 7.84  | 263           | 8               | 5                |
| HRG_HUMAN   | Histidine-rich glycoprotein                              | 59541  | 7.09  | 55            | 1               | 1                |
| H12_HUMAN   | Histone H1.2                                             | 21352  | 10.94 | 100           | 2               | 2                |
| H13_HUMAN   | Histone H1.3                                             | 22336  | 11.02 | 39            | 1               | 1                |
| H1T_HUMAN   | Histone H1t                                              | 22006  | 11.71 | 39            | 1               | 1                |
| H2A1A_HUMAN | Histone H2A type 1-A                                     | 14225  | 10.86 | 50            | 1               | 1                |
| H2B1A_HUMAN | Histone H2B type 1-A                                     | 14159  | 10.31 | 40            | 1               | 1                |
| H2B1B_HUMAN | Histone H2B type 1-B                                     | 13942  | 10.31 | 39            | 1               | 1                |
| H4_HUMAN    | Histone H4                                               | 11360  | 11.36 | 49            | 1               | 1                |
| KMT2C_HUMAN | Histone-lysine N-methyltransferase 2C                    | 541028 | 6.07  | 35            | 1               | 1                |
| KMT2D_HUMAN | Histone-lysine N-methyltransferase 2D                    | 593389 | 5.40  | 42            | 1               | 1                |
| 1A01_HUMAN  | HLA class I histocompatibility antigen, A-1 alpha chain  | 40820  | 6.09  | 35            | 1               | 1                |
| 1A23_HUMAN  | HLA class I histocompatibility antigen, A-23 alpha chain | 40707  | 5.91  | 35            | 1               | 1                |
| 1A26_HUMAN  | HLA class I histocompatibility antigen, A-26 alpha chain | 41036  | 6.08  | 35            | 1               | 1                |
| 1A80_HUMAN  | HLA class I histocompatibility antigen, A-80 alpha chain | 40766  | 5.90  | 35            | 1               | 1                |
| HMGX3_HUMAN | HMG domain-containing protein 3                          | 168228 | 8.39  | 38            | 1               | 1                |
| CDX1_HUMAN  | Homeobox protein CDX-1                                   | 28120  | 9.58  | 49            | 1               | 1                |
| HIPK4_HUMAN | Homeodomain-interacting protein kinase 4                 | 69381  | 6.18  | 35            | 1               | 1                |
| HORN_HUMAN  | Hornerin                                                 | 282228 | 10.05 | 64            | 1               | 1                |
| CDC37_HUMAN | Hsp90 co-chaperone Cdc37                                 | 44468  | 5.17  | 37            | 1               | 1                |
| LOXE3_HUMAN | Hydroperoxide isomerase AL                               | 80543  | 6.53  | 39            | 1               | 1                |
| IGHA1_HUMAN | Ig alpha-1 chain C region                                | 37631  | 6.08  | 771           | 24              | 10               |
| IGHA2_HUMAN | Ig alpha-2 chain C region                                | 36503  | 5.86  | 350           | 9               | 6                |
| IGHD_HUMAN  | Ig delta chain C region                                  | 42227  | 8.38  | 103           | 2               | 1                |
| IGHG1_HUMAN | Ig gamma-1 chain C region                                | 36083  | 8.46  | 1208          | 39              | 10               |
| IGHG2_HUMAN | Ig gamma-2 chain C region                                | 35878  | 7.66  | 644           | 22              | 7                |
| IGHG3_HUMAN | Ig gamma-3 chain C region                                | 41260  | 8.23  | 736           | 26              | 10               |
| IGHG4_HUMAN | Ig gamma-4 chain C region                                | 35918  | 7.18  | 638           | 22              | 7                |
| IGKC_HUMAN  | Ig kappa chain C region                                  | 11602  | 6.11  | 2146          | 90              | 5                |
| IGHM_HUMAN  | Immunoglobulin heavy constant mu                         | 49276  | 6.35  | 1317          | 50              | 16               |
| HV102_HUMAN | Immunoglobulin heavy variable 1-2                        | 13076  | 9.23  | 62            | 1               | 1                |
| HV103_HUMAN | Immunoglobulin heavy variable 1-3                        | 12999  | 9.59  | 66            | 1               | 1                |
| HV146_HUMAN | Immunoglobulin heavy variable 1-46                       | 12924  | 9.10  | 38            | 1               | 1                |
| HV311_HUMAN | Immunoglobulin heavy variable 3-11                       | 12900  | 8.82  | 63            | 1               | 1                |
| HV313_HUMAN | Immunoglobulin heavy variable 3-13                       | 12498  | 6.54  | 187           | 5               | 1                |
| HV315_HUMAN | Immunoglobulin heavy variable 3-15                       | 12917  | 8.84  | 67            | 2               | 2                |

Table SI. Continued.

| Entry names | Protein names                                                   | MW, Da | pI    | Protein score | Peptide matches | Unique sequences |
|-------------|-----------------------------------------------------------------|--------|-------|---------------|-----------------|------------------|
| HV321_HUMAN | Immunoglobulin heavy variable 3-21                              | 12831  | 8.49  | 157           | 3               | 2                |
| HV323_HUMAN | Immunoglobulin heavy variable 3-23                              | 12574  | 8.49  | 187           | 4               | 2                |
| HV330_HUMAN | Immunoglobulin heavy variable 3-30                              | 12938  | 9.10  | 252           | 5               | 2                |
| HV333_HUMAN | Immunoglobulin heavy variable 3-33                              | 13066  | 9.12  | 214           | 4               | 2                |
| HV348_HUMAN | Immunoglobulin heavy variable 3-48                              | 12804  | 5.31  | 107           | 3               | 1                |
| HV349_HUMAN | Immunoglobulin heavy variable 3-49                              | 13048  | 8.84  | 69            | 1               | 1                |
| HV364_HUMAN | Immunoglobulin heavy variable 3-64                              | 12882  | 7.69  | 48            | 1               | 1                |
| HV307_HUMAN | Immunoglobulin heavy variable 3-7                               | 12934  | 6.21  | 260           | 6               | 3                |
| HV309_HUMAN | Immunoglobulin heavy variable 3-9                               | 12936  | 6.55  | 186           | 5               | 1                |
| HV434_HUMAN | Immunoglobulin heavy variable 4-34                              | 13806  | 9.39  | 114           | 4               | 2                |
| HV439_HUMAN | Immunoglobulin heavy variable 4-39                              | 13908  | 9.35  | 114           | 4               | 2                |
| IGJ_HUMAN   | Immunoglobulin J chain                                          | 18087  | 5.09  | 105           | 2               | 1                |
| KV117_HUMAN | Immunoglobulin kappa variable 1-17                              | 12770  | 8.93  | 56            | 2               | 1                |
| KV105_HUMAN | Immunoglobulin kappa variable 1-5                               | 12773  | 8.49  | 101           | 2               | 1                |
| KVD33_HUMAN | Immunoglobulin kappa variable 1D-33                             | 12840  | 4.53  | 39            | 1               | 1                |
| KV230_HUMAN | Immunoglobulin kappa variable 2-30                              | 13177  | 8.71  | 302           | 6               | 2                |
| KVD28_HUMAN | Immunoglobulin kappa variable 2D-28                             | 12948  | 5.61  | 252           | 4               | 2                |
| KVD30_HUMAN | Immunoglobulin kappa variable 2D-30                             | 13207  | 7.79  | 302           | 6               | 2                |
| KVD40_HUMAN | Immunoglobulin kappa variable 2D-40                             | 13302  | 4.43  | 335           | 7               | 3                |
| KV311_HUMAN | Immunoglobulin kappa variable 3-11                              | 12567  | 4.85  | 118           | 3               | 2                |
| KV315_HUMAN | Immunoglobulin kappa variable 3-15                              | 12488  | 5.14  | 166           | 5               | 2                |
| KV320_HUMAN | Immunoglobulin kappa variable 3-20                              | 12549  | 4.85  | 354           | 7               | 3                |
| KVD20_HUMAN | Immunoglobulin kappa variable 3D-20                             | 12507  | 4.46  | 266           | 6               | 2                |
| KV401_HUMAN | Immunoglobulin kappa variable 4-1                               | 13372  | 5.09  | 167           | 7               | 3                |
| IGLC1_HUMAN | Immunoglobulin lambda constant 1                                | 11341  | 7.89  | 231           | 6               | 2                |
| IGLC2_HUMAN | Immunoglobulin lambda constant 2                                | 11287  | 6.91  | 767           | 23              | 4                |
| IGLC3_HUMAN | Immunoglobulin lambda constant 3                                | 11231  | 6.91  | 499           | 13              | 3                |
| IGLC6_HUMAN | Immunoglobulin lambda constant 6                                | 11270  | 6.91  | 664           | 20              | 3                |
| IGLC7_HUMAN | Immunoglobulin lambda constant 7                                | 11296  | 8.50  | 506           | 14              | 2                |
| LV147_HUMAN | Immunoglobulin lambda variable 1-47                             | 12276  | 5.55  | 138           | 2               | 1                |
| LV151_HUMAN | Immunoglobulin lambda variable 1-51                             | 12241  | 6.50  | 48            | 1               | 1                |
| LV211_HUMAN | Immunoglobulin lambda variable 2-11                             | 12636  | 6.69  | 44            | 1               | 1                |
| LV208_HUMAN | Immunoglobulin lambda variable 2-8                              | 12374  | 5.59  | 39            | 1               | 1                |
| LV319_HUMAN | Immunoglobulin lambda variable 3-19                             | 12035  | 4.76  | 96            | 2               | 1                |
| LV321_HUMAN | Immunoglobulin lambda variable 3-21                             | 12438  | 5.03  | 340           | 7               | 2                |
| LV325_HUMAN | Immunoglobulin lambda variable 3-25                             | 12004  | 4.37  | 115           | 3               | 2                |
| LV743_HUMAN | Immunoglobulin lambda variable 7-43                             | 12443  | 6.52  | 56            | 1               | 1                |
| IGLL1_HUMAN | Immunoglobulin lambda-like polypeptide 1                        | 22949  | 10.10 | 64            | 2               | 1                |
| IGLL5_HUMAN | Immunoglobulin lambda-like polypeptide 5                        | 23049  | 9.08  | 456           | 18              | 4                |
| PLCL2_HUMAN | Inactive phospholipase C-like protein 2                         | 125785 | 6.47  | 44            | 3               | 1                |
| IN80D_HUMAN | INO80 complex subunit D                                         | 98174  | 8.48  | 37            | 1               | 1                |
| IRS4_HUMAN  | Insulin receptor substrate 4                                    | 133685 | 8.72  | 37            | 1               | 1                |
| IF172_HUMAN | Intraflagellar transport protein 172 homolog                    | 197451 | 5.78  | 37            | 1               | 1                |
| NUBPL_HUMAN | Iron-sulfur protein NUBPL                                       | 34061  | 9.17  | 35            | 1               | 1                |
| PLAK_HUMAN  | Junction plakoglobin                                            | 81693  | 5.75  | 143           | 4               | 4                |
| KATL1_HUMAN | Katanin p60 ATPase-containing subunit A-like 1                  | 55357  | 6.35  | 35            | 1               | 1                |
| KSR2_HUMAN  | Kinase suppressor of Ras 2                                      | 107564 | 8.95  | 37            | 1               | 1                |
| KI18A_HUMAN | Kinesin-like protein KIF18A                                     | 102216 | 9.09  | 40            | 1               | 1                |
| KAT3_HUMAN  | Kynurenine-oxoglutarate transaminase 3                          | 51368  | 8.40  | 37            | 1               | 1                |
| TRFL_HUMAN  | Lactotransferrin                                                | 78132  | 8.50  | 42            | 1               | 1                |
| LAMB1_HUMAN | Laminin subunit beta-1                                          | 197909 | 4.83  | 54            | 2               | 1                |
| LIMS1_HUMAN | LIM and senescent cell antigen-like-containing domain protein 1 | 37226  | 8.43  | 35            | 1               | 1                |
| LHX2_HUMAN  | LIM/homeobox protein Lhx2                                       | 44345  | 8.81  | 39            | 1               | 1                |

Table SI. Continued.

| Entry names | Protein names                                                | MW, Da  | pI    | Protein score | Peptide matches | Unique sequences |
|-------------|--------------------------------------------------------------|---------|-------|---------------|-----------------|------------------|
| LSAMP_HUMAN | Limbic system-associated membrane protein                    | 37370   | 6.55  | 39            | 1               | 1                |
| LOXH1_HUMAN | Lipoxygenase homology domain-containing protein 1            | 221807  | 5.38  | 48            | 2               | 1                |
| MASP1_HUMAN | Mannan-binding lectin serine protease 1                      | 79195   | 5.29  | 38            | 1               | 1                |
| MEIOC_HUMAN | Meiosis-specific coiled-coil domain-containing protein MEIOC | 107491  | 6.68  | 44            | 1               | 1                |
| MTAP2_HUMAN | Microtubule-associated protein 2                             | 199404  | 4.82  | 38            | 1               | 1                |
| MDN1_HUMAN  | Midasin                                                      | 632420  | 5.46  | 38            | 1               | 1                |
| S2542_HUMAN | Mitochondrial coenzyme A transporter SLC25A42                | 35387   | 10.08 | 41            | 1               | 1                |
| MCE1_HUMAN  | mRNA-capping enzyme                                          | 68513   | 8.43  | 51            | 2               | 1                |
| MUC16_HUMAN | Mucin-16                                                     | 1518242 | 5.13  | 38            | 1               | 1                |
| MUC5A_HUMAN | Mucin-5AC                                                    | 585199  | 6.71  | 35            | 1               | 1                |
| MUC5B_HUMAN | Mucin-5B                                                     | 595960  | 6.20  | 72            | 1               | 1                |
| MRP5_HUMAN  | Multidrug resistance-associated protein 5                    | 160558  | 8.87  | 49            | 3               | 2                |
| MRP9_HUMAN  | Multidrug resistance-associated protein 9                    | 152200  | 8.64  | 47            | 2               | 1                |
| ACM5_HUMAN  | Muscarinic acetylcholine receptor M5                         | 60074   | 9.39  | 41            | 1               | 1                |
| MYL1_HUMAN  | Myosin light chain 1/3, skeletal muscle isoform              | 21145   | 4.97  | 35            | 1               | 1                |
| MYL6_HUMAN  | Myosin light polypeptide 6                                   | 16930   | 4.56  | 35            | 1               | 1                |
| MYH10_HUMAN | Myosin-10                                                    | 228858  | 5.43  | 43            | 2               | 1                |
| MYH11_HUMAN | Myosin-11                                                    | 227199  | 5.42  | 44            | 1               | 1                |
| MYH6_HUMAN  | Myosin-6                                                     | 223596  | 5.58  | 37            | 1               | 1                |
| N4BP3_HUMAN | NEDD4-binding protein 3                                      | 60433   | 8.33  | 39            | 1               | 1                |
| NELFB_HUMAN | Negative elongation factor B                                 | 65655   | 5.77  | 38            | 1               | 1                |
| NRX2A_HUMAN | Neurexin-2                                                   | 184865  | 5.61  | 35            | 1               | 1                |
| NFH_HUMAN   | Neurofilament heavy polypeptide                              | 112411  | 5.99  | 111           | 3               | 2                |
| NAV2_HUMAN  | Neuron navigator 2                                           | 268003  | 9.13  | 38            | 1               | 1                |
| NSF1C_HUMAN | NSFL1 cofactor p47                                           | 40548   | 4.99  | 36            | 1               | 1                |
| TIA1_HUMAN  | Nucleolysin TIA-1 isoform p40                                | 42936   | 7.62  | 43            | 1               | 1                |
| O6C74_HUMAN | Olfactory receptor 6C74                                      | 35230   | 8.95  | 39            | 1               | 1                |
| OXR1_HUMAN  | Oxidation resistance protein 1                               | 97970   | 5.32  | 37            | 1               | 1                |
| OSBL3_HUMAN | Oxysterol-binding protein-related protein 3                  | 101224  | 6.42  | 39            | 1               | 1                |
| PX11B_HUMAN | Peroxisomal membrane protein 11B                             | 28431   | 9.91  | 37            | 1               | 1                |
| PEX1_HUMAN  | Peroxisome biogenesis factor 1                               | 142778  | 5.91  | 39            | 2               | 1                |
| PSD1_HUMAN  | PH and SEC7 domain-containing protein 1                      | 109475  | 6.43  | 36            | 1               | 1                |
| PHAR1_HUMAN | Phosphatase and actin regulator 1                            | 66267   | 6.51  | 35            | 1               | 1                |
| PGM1_HUMAN  | Phosphoglucomutase-1                                         | 61411   | 6.30  | 38            | 2               | 1                |
| PGK2_HUMAN  | Phosphoglycerate kinase 2                                    | 44767   | 8.74  | 35            | 2               | 1                |
| PININ_HUMAN | Pinin                                                        | 81628   | 6.71  | 36            | 1               | 1                |
| KLKB1_HUMAN | Plasma kallikrein                                            | 71323   | 8.60  | 67            | 1               | 1                |
| IC1_HUMAN   | Plasma protease C1 inhibitor                                 | 55119   | 6.09  | 456           | 16              | 9                |
| PLMN_HUMAN  | Plasminogen                                                  | 90510   | 7.04  | 82            | 3               | 3                |
| PLGB_HUMAN  | Plasminogen-like protein B                                   | 10964   | 6.11  | 42            | 1               | 1                |
| CXCL7_HUMAN | Platelet basic protein                                       | 13885   | 9.04  | 47            | 2               | 1                |
| PKHG6_HUMAN | Pleckstrin homology domain-containing family G member 6      | 88960   | 6.63  | 37            | 1               | 1                |
| GALT3_HUMAN | Polypeptide N-acetylgalactosaminyltransferase 3              | 72564   | 8.20  | 36            | 1               | 1                |
| POPD2_HUMAN | Popeye domain-containing protein 2                           | 40448   | 5.23  | 48            | 1               | 1                |
| POTEE_HUMAN | POTE ankyrin domain family member E                          | 121286  | 5.83  | 42            | 1               | 1                |
| POTEF_HUMAN | POTE ankyrin domain family member F                          | 121367  | 5.82  | 42            | 1               | 1                |
| PZP_HUMAN   | Pregnancy zone protein                                       | 163760  | 5.97  | 861           | 28              | 14               |
| DDX17_HUMAN | Probable ATP-dependent RNA helicase DDX17                    | 80272   | 8.53  | 35            | 1               | 1                |
| ZC12C_HUMAN | Probable ribonuclease ZC3H12C                                | 99340   | 6.48  | 38            | 1               | 1                |
| PRGR_HUMAN  | Progesterone receptor                                        | 98918   | 6.09  | 38            | 1               | 1                |

Table SI. Continued.

| Entry names | Protein names                                                  | MW, Da  | pI    | Protein score | Peptide matches | Unique sequences |
|-------------|----------------------------------------------------------------|---------|-------|---------------|-----------------|------------------|
| PRR30_HUMAN | Proline-rich protein 30                                        | 44662   | 10.39 | 38            | 1               | 1                |
| ECM29_HUMAN | Proteasome-associated protein ECM29 homolog                    | 204160  | 6.74  | 35            | 1               | 1                |
| AMBP_HUMAN  | Protein AMBP                                                   | 38974   | 5.95  | 66            | 1               | 1                |
| DEK_HUMAN   | Protein DEK                                                    | 42648   | 8.69  | 35            | 1               | 1                |
| F1712_HUMAN | Protein FAM171A2                                               | 87435   | 8.14  | 35            | 1               | 1                |
| OSCP1_HUMAN | Protein OSCP1                                                  | 44558   | 5.64  | 47            | 2               | 1                |
| S10A6_HUMAN | Protein S100-A6                                                | 10173   | 5.32  | 104           | 7               | 2                |
| S10A7_HUMAN | Protein S100-A7                                                | 11464   | 6.27  | 43            | 1               | 1                |
| S10A8_HUMAN | Protein S100-A8                                                | 10828   | 6.50  | 109           | 2               | 2                |
| TGM7_HUMAN  | Protein-glutamine gamma-glutamyltransferase Z                  | 79941   | 6.54  | 47            | 3               | 1                |
| THRB_HUMAN  | Prothrombin                                                    | 69992   | 5.63  | 56            | 2               | 2                |
| PCDH9_HUMAN | Protocadherin-9                                                | 136064  | 5.26  | 35            | 1               | 1                |
| HLAH_HUMAN  | Putative HLA class I histocompatibility antigen, alpha chain H | 40866   | 5.91  | 35            | 1               | 1                |
| ASXL1_HUMAN | Putative Polycomb group protein ASXL1                          | 165345  | 5.85  | 39            | 1               | 1                |
| ZN815_HUMAN | Putative protein ZNF815                                        | 15437   | 6.04  | 35            | 1               | 1                |
| AUXI_HUMAN  | Putative tyrosine-protein phosphatase auxilin                  | 99933   | 6.82  | 39            | 1               | 1                |
| CU129_HUMAN | Putative uncharacterized protein encoded by LINC00479          | 15208   | 8.28  | 35            | 1               | 1                |
| REEP5_HUMAN | Receptor expression-enhancing protein 5                        | 21479   | 8.25  | 46            | 2               | 1                |
| RGS4_HUMAN  | Regulator of G-protein signaling 4                             | 23241   | 8.69  | 41            | 2               | 1                |
| RENT2_HUMAN | Regulator of nonsense transcripts 2                            | 147717  | 5.50  | 36            | 1               | 1                |
| RIPR3_HUMAN | RIPOR family member 3                                          | 105224  | 7.26  | 41            | 1               | 1                |
| RBM45_HUMAN | RNA-binding protein 45                                         | 53502   | 6.74  | 42            | 1               | 1                |
| DVL2_HUMAN  | Segment polarity protein dishevelled homolog DVL-2             | 78948   | 5.67  | 38            | 1               | 1                |
| NEK10_HUMAN | Serine/threonine-protein kinase Nek10                          | 133176  | 6.35  | 35            | 1               | 1                |
| NEK5_HUMAN  | Serine/threonine-protein kinase Nek5                           | 81393   | 9.05  | 39            | 1               | 1                |
| TRFE_HUMAN  | Serotransferrin                                                | 77014   | 6.81  | 4418          | 126             | 34               |
| ALBU_HUMAN  | Serum albumin                                                  | 69321   | 5.92  | 7815          | 287             | 44               |
| SAA1_HUMAN  | Serum amyloid A-1 protein                                      | 13524   | 6.28  | 38            | 1               | 1                |
| SAA2_HUMAN  | Serum amyloid A-2 protein                                      | 13519   | 9.20  | 78            | 2               | 2                |
| SAA4_HUMAN  | Serum amyloid A-4 protein                                      | 14737   | 9.17  | 201           | 5               | 2                |
| PON1_HUMAN  | Serum paraoxonase/arylesterase 1                               | 39706   | 5.08  | 51            | 1               | 1                |
| SH3K1_HUMAN | SH3 domain-containing kinase-binding protein 1                 | 73082   | 6.24  | 43            | 1               | 1                |
| SLIT3_HUMAN | Slit homolog 3 protein                                         | 167604  | 7.99  | 35            | 2               | 1                |
| SPR2D_HUMAN | Small proline-rich protein 2D                                  | 7900    | 8.77  | 43            | 1               | 1                |
| SCNBA_HUMAN | Sodium channel protein type 11 subunit alpha                   | 204778  | 8.32  | 40            | 2               | 1                |
| S22A6_HUMAN | Solute carrier family 22 member 6                              | 61776   | 9.05  | 35            | 1               | 1                |
| SORT_HUMAN  | Sortilin                                                       | 92009   | 5.46  | 71            | 3               | 1                |
| SPG17_HUMAN | Sperm-associated antigen 17                                    | 251742  | 5.88  | 41            | 1               | 1                |
| SRC8_HUMAN  | Src substrate cortactin                                        | 61586   | 5.24  | 35            | 1               | 1                |
| SLAP1_HUMAN | Src-like-adaptor                                               | 31137   | 7.61  | 35            | 1               | 1                |
| STAR9_HUMAN | StAR-related lipid transfer protein 9                          | 516023  | 5.91  | 38            | 1               | 1                |
| SMC2_HUMAN  | Structural maintenance of chromosomes protein 2                | 135572  | 8.54  | 39            | 1               | 1                |
| SUN3_HUMAN  | SUN domain-containing protein 3                                | 40503   | 7.68  | 40            | 1               | 1                |
| TCPH_HUMAN  | T-complex protein 1 subunit eta                                | 59367   | 7.55  | 39            | 1               | 1                |
| THOC2_HUMAN | THO complex subunit 2                                          | 182659  | 8.67  | 42            | 1               | 1                |
| TITIN_HUMAN | Titin                                                          | 3813652 | 6.02  | 36            | 1               | 1                |
| TGRM2_HUMAN | TOG array regulator of axonemal microtubules protein 2         | 111084  | 9.51  | 41            | 1               | 1                |
| TNIK_HUMAN  | TRAF2 and NCK-interacting protein kinase                       | 154848  | 6.70  | 38            | 1               | 1                |
| MIPT3_HUMAN | TRAF3-interacting protein 1                                    | 78584   | 7.95  | 36            | 1               | 1                |
| TRAK2_HUMAN | Trafficking kinesin-binding protein 2                          | 101356  | 5.14  | 40            | 1               | 1                |

Table SI. Continued.

| Entry names | Protein names                                             | MW, Da | pI    | Protein score | Peptide matches | Unique sequences |
|-------------|-----------------------------------------------------------|--------|-------|---------------|-----------------|------------------|
| TAF7_HUMAN  | Transcription initiation factor TFIID subunit 7           | 40234  | 5.07  | 50            | 1               | 1                |
| TTF1_HUMAN  | Transcription termination factor 1                        | 102987 | 9.41  | 36            | 1               | 1                |
| MYB_HUMAN   | Transcriptional activator Myb                             | 72341  | 6.35  | 44            | 1               | 1                |
| TMPPE_HUMAN | Transmembrane protein with metallophosphoesterase domain  | 49421  | 6.43  | 35            | 1               | 1                |
| TTHY_HUMAN  | Transthyretin                                             | 15877  | 5.49  | 231           | 6               | 4                |
| TNR6B_HUMAN | Trinucleotide repeat-containing gene 6B protein           | 193883 | 6.31  | 36            | 1               | 1                |
| SEN2_HUMAN  | tRNA-splicing endonuclease subunit Sen2                   | 53247  | 7.95  | 42            | 1               | 1                |
| TYMOS_HUMAN | TYMS opposite strand protein                              | 13402  | 12.04 | 36            | 1               | 1                |
| FES_HUMAN   | Tyrosine-protein kinase Fes/Fps                           | 93438  | 6.27  | 45            | 2               | 1                |
| UBP16_HUMAN | Ubiquitin carboxyl-terminal hydrolase 16                  | 93570  | 6.50  | 37            | 1               | 1                |
| UBP47_HUMAN | Ubiquitin carboxyl-terminal hydrolase 47                  | 157212 | 4.97  | 38            | 1               | 1                |
| OTUL_HUMAN  | Ubiquitin thioesterase otulin                             | 40263  | 5.35  | 38            | 1               | 1                |
| MYO5A_HUMAN | Unconventional myosin-Va                                  | 215269 | 8.70  | 46            | 1               | 1                |
| K1324_HUMAN | UPF0577 protein KIAA1324                                  | 111309 | 6.13  | 44            | 1               | 1                |
| CT027_HUMAN | UPF0687 protein C2orf27                                   | 19279  | 6.34  | 35            | 1               | 1                |
| VP13C_HUMAN | Vacuolar protein sorting-associated protein 13C           | 422124 | 6.38  | 40            | 1               | 1                |
| VANG2_HUMAN | Vang-like protein 2                                       | 59714  | 9.27  | 37            | 1               | 1                |
| PROS_HUMAN  | Vitamin K-dependent protein S                             | 75074  | 5.48  | 102           | 4               | 4                |
| CAC1H_HUMAN | Voltage-dependent T-type calcium channel subunit alpha-1H | 258997 | 7.13  | 44            | 1               | 1                |
| VWA8_HUMAN  | von Willebrand factor A domain-containing protein 8       | 214689 | 7.01  | 35            | 1               | 1                |
| WDR17_HUMAN | WD repeat-containing protein 17                           | 147608 | 6.01  | 59            | 5               | 1                |
| WDR7_HUMAN  | WD repeat-containing protein 7                            | 163705 | 6.47  | 36            | 1               | 1                |
| WDR76_HUMAN | WD repeat-containing protein 76                           | 69769  | 9.35  | 38            | 1               | 1                |
| WRN_HUMAN   | Werner syndrome ATP-dependent helicase                    | 162357 | 5.96  | 36            | 1               | 1                |
| XDH_HUMAN   | Xanthine dehydrogenase/oxidase                            | 146330 | 7.86  | 49            | 1               | 1                |
| ZBT7A_HUMAN | Zinc finger and BTB domain-containing protein 7A          | 61439  | 4.98  | 40            | 1               | 1                |
| ZC3HD_HUMAN | Zinc finger CCCH domain-containing protein 13             | 196635 | 9.45  | 36            | 1               | 1                |
| ZN142_HUMAN | Zinc finger protein 142                                   | 187758 | 8.24  | 41            | 1               | 1                |
| ZNF34_HUMAN | Zinc finger protein 34                                    | 63998  | 9.05  | 37            | 1               | 1                |
| ZN469_HUMAN | Zinc finger protein 469                                   | 409949 | 7.88  | 40            | 1               | 1                |
| ZNF48_HUMAN | Zinc finger protein 48                                    | 67820  | 9.51  | 41            | 1               | 1                |
| ZN581_HUMAN | Zinc finger protein 581                                   | 21996  | 9.16  | 37            | 1               | 1                |
| ZN658_HUMAN | Zinc finger protein 658                                   | 122274 | 8.63  | 39            | 1               | 1                |
| Z658B_HUMAN | Zinc finger protein 658B                                  | 94331  | 8.90  | 39            | 1               | 1                |
| DPF1_HUMAN  | Zinc finger protein neuro-d4                              | 42475  | 6.47  | 35            | 1               | 1                |
| OZF_HUMAN   | Zinc finger protein OZF                                   | 33308  | 9.15  | 37            | 1               | 1                |
| ZKSC2_HUMAN | Zinc finger protein with KRAB and SCAN domains 2          | 110870 | 8.68  | 41            | 1               | 1                |
| FOG2_HUMAN  | Zinc finger protein ZFPM2                                 | 128159 | 6.03  | 36            | 1               | 1                |
| S39A6_HUMAN | Zinc transporter ZIP6                                     | 84993  | 6.45  | 35            | 1               | 1                |

MW, molecular weight; pI, isoelectric point.

Table SII. List of proteins identified by liquid chromatography with tandem mass spectrometry with score  $\geq 35$  in flow-through fractions.

| Names       | Description                                                            | MW, Da | pI    | Protein score | Peptide matches | Unique sequences |
|-------------|------------------------------------------------------------------------|--------|-------|---------------|-----------------|------------------|
| CJ090_HUMAN | (E2-independent) E3 ubiquitin-conjugating enzyme FATS                  | 77862  | 9.21  | 39            | 1               | 1                |
| RM38_HUMAN  | 39S ribosomal protein L38, mitochondrial                               | 44568  | 7.19  | 37            | 1               | 1                |
| OXSM_HUMAN  | 3-Oxoacyl-[acyl-carrier-protein] synthase, mitochondrial               | 48812  | 7.59  | 41            | 2               | 1                |
| RLA0_HUMAN  | 60S acidic ribosomal protein P0                                        | 34252  | 5.70  | 94            | 2               | 2                |
| AACS_HUMAN  | Acetoacetyl-CoA synthetase                                             | 75096  | 5.86  | 35            | 1               | 1                |
| HRK_HUMAN   | Activator of apoptosis harakiri                                        | 9877   | 11.75 | 37            | 1               | 1                |
| AGRL1_HUMAN | Adhesion G protein-coupled receptor L1                                 | 162614 | 6.17  | 39            | 1               | 1                |
| ADIPO_HUMAN | Adiponectin                                                            | 26397  | 5.42  | 151           | 4               | 3                |
| AFAD_HUMAN  | Afadin                                                                 | 206804 | 6.06  | 42            | 1               | 1                |
| AFAM_HUMAN  | Afamin                                                                 | 69024  | 5.64  | 1035          | 36              | 18               |
| AKP13_HUMAN | A-kinase anchor protein 13                                             | 307359 | 5.12  | 39            | 1               | 1                |
| AAAS_HUMAN  | Aladin                                                                 | 59574  | 7.26  | 49            | 1               | 1                |
| AACT_HUMAN  | Alpha-1-antichymotrypsin                                               | 47621  | 5.33  | 2744          | 85              | 15               |
| A1BG_HUMAN  | Alpha-1B-glycoprotein                                                  | 54220  | 5.56  | 1345          | 41              | 13               |
| A2AP_HUMAN  | Alpha-2-antiplasmin                                                    | 54531  | 5.87  | 335           | 10              | 7                |
| FETUA_HUMAN | Alpha-2-HS-glycoprotein                                                | 39300  | 5.43  | 672           | 22              | 7                |
| A2MG_HUMAN  | Alpha-2-macroglobulin                                                  | 163188 | 6.03  | 101           | 3               | 3                |
| AASS_HUMAN  | Alpha-aminoadipic semialdehyde synthase, mitochondrial                 | 102066 | 6.18  | 37            | 1               | 1                |
| AMY2B_HUMAN | Alpha-amylase 2B                                                       | 57673  | 6.64  | 57            | 2               | 2                |
| A4_HUMAN    | Amyloid-beta precursor protein                                         | 86888  | 4.73  | 36            | 1               | 1                |
| ANGT_HUMAN  | Angiotensinogen                                                        | 53121  | 5.87  | 1286          | 34              | 12               |
| ASB2_HUMAN  | Ankyrin repeat and SOCS box protein 2                                  | 65084  | 7.55  | 47            | 1               | 1                |
| ANXA2_HUMAN | Annexin A2                                                             | 38580  | 7.57  | 52            | 1               | 1                |
| ANT3_HUMAN  | Antithrombin-III                                                       | 52569  | 6.32  | 1731          | 52              | 18               |
| AP4S1_HUMAN | AP-4 complex subunit sigma-1                                           | 16994  | 5.08  | 45            | 3               | 1                |
| APOA2_HUMAN | Apolipoprotein A-II                                                    | 11168  | 6.27  | 175           | 6               | 2                |
| APOA4_HUMAN | Apolipoprotein A-IV                                                    | 45371  | 5.28  | 1191          | 38              | 21               |
| APOB_HUMAN  | Apolipoprotein B-100                                                   | 515283 | 6.58  | 14958         | 450             | 196              |
| APOC1_HUMAN | Apolipoprotein C-I                                                     | 9326   | 8.01  | 120           | 5               | 3                |
| APOC2_HUMAN | Apolipoprotein C-II                                                    | 11277  | 4.64  | 187           | 4               | 4                |
| APOC3_HUMAN | Apolipoprotein C-III                                                   | 10846  | 5.23  | 105           | 2               | 2                |
| APOC4_HUMAN | Apolipoprotein C-IV                                                    | 14543  | 9.19  | 122           | 5               | 3                |
| APOD_HUMAN  | Apolipoprotein D                                                       | 21262  | 5.06  | 53            | 1               | 1                |
| APOE_HUMAN  | Apolipoprotein E                                                       | 36132  | 5.65  | 1620          | 49              | 18               |
| APOF_HUMAN  | Apolipoprotein F                                                       | 35377  | 5.42  | 73            | 1               | 1                |
| APOM_HUMAN  | Apolipoprotein M                                                       | 21239  | 5.66  | 50            | 1               | 1                |
| APOA_HUMAN  | Apolipoprotein(a)                                                      | 500995 | 5.58  | 72            | 2               | 1                |
| AIFM2_HUMAN | Apoptosis-inducing factor 2                                            | 40501  | 9.16  | 135           | 4               | 1                |
| APAF_HUMAN  | Apoptotic protease-activating factor 1                                 | 141749 | 5.95  | 44            | 1               | 1                |
| ARFP1_HUMAN | Arfaptin-1                                                             | 41713  | 6.24  | 53            | 2               | 1                |
| ASAP2_HUMAN | Arf-GAP with SH3 domain, ANK repeat and PH domain containing protein 2 | 111581 | 6.24  | 41            | 2               | 1                |
| ARG11_HUMAN | Arginase-1                                                             | 34713  | 6.72  | 59            | 1               | 1                |
| PNISR_HUMAN | Arginine/serine-rich protein PNISR                                     | 92521  | 10.02 | 37            | 1               | 1                |
| ATPA_HUMAN  | ATP synthase subunit alpha, mitochondrial                              | 59751  | 9.16  | 45            | 2               | 1                |
| ATAD5_HUMAN | ATPase family AAA domain-containing protein 5                          | 207441 | 9.27  | 45            | 2               | 1                |
| DX39A_HUMAN | ATP-dependent RNA helicase DDX39A                                      | 49130  | 5.46  | 35            | 1               | 1                |
| ATRN_HUMAN  | Attractin                                                              | 158432 | 7.24  | 461           | 18              | 13               |
| BBS2_HUMAN  | Bardet-Biedl syndrome 2 protein                                        | 79871  | 5.74  | 35            | 1               | 1                |
| PGBM_HUMAN  | Basement membrane-specific heparan sulfate proteoglycan core protein   | 468532 | 6.06  | 38            | 1               | 1                |



Table SII. Continued.

| Names       | Description                                                 | MW, Da | pI   | Protein score | Peptide matches | Unique sequences |
|-------------|-------------------------------------------------------------|--------|------|---------------|-----------------|------------------|
| APOH_HUMAN  | Beta-2-glycoprotein 1                                       | 38273  | 8.34 | 856           | 26              | 10               |
| B2MG_HUMAN  | Beta-2-microglobulin                                        | 13706  | 6.06 | 176           | 5               | 3                |
| CNDP1_HUMAN | Beta-Ala-His dipeptidase                                    | 56670  | 5.14 | 176           | 6               | 5                |
| BGLR_HUMAN  | Beta-glucuronidase                                          | 74732  | 6.54 | 36            | 1               | 1                |
| BTD_HUMAN   | Biotinidase                                                 | 61093  | 5.81 | 198           | 6               | 5                |
| CD20_HUMAN  | B-lymphocyte antigen CD20                                   | 33077  | 5.04 | 35            | 1               | 1                |
| BCAR1_HUMAN | Breast cancer anti-estrogen resistance protein 1            | 93372  | 5.41 | 35            | 1               | 1                |
| BIG1_HUMAN  | Brefeldin A-inhibited guanine nucleotide-exchange protein 1 | 208634 | 5.58 | 43            | 1               | 1                |
| BRD7_HUMAN  | Bromodomain-containing protein 7                            | 74139  | 6.00 | 35            | 1               | 1                |
| KCD18_HUMAN | BTB/POZ domain-containing protein KCTD18                    | 46710  | 9.23 | 41            | 2               | 1                |
| CAD11_HUMAN | Cadherin-11                                                 | 87965  | 4.75 | 36            | 1               | 1                |
| CADH5_HUMAN | Cadherin-5                                                  | 87474  | 5.22 | 58            | 1               | 1                |
| CAHM6_HUMAN | Calcium homeostasis modulator protein 6                     | 34458  | 8.87 | 40            | 2               | 1                |
| KKCC2_HUMAN | Calcium/calmodulin-dependent protein kinase kinase 2        | 64746  | 6.25 | 35            | 1               | 1                |
| AT2C1_HUMAN | Calcium-transporting ATPase type 2C member 1                | 100577 | 6.34 | 36            | 1               | 1                |
| CAN2_HUMAN  | Calpain-2 catalytic subunit                                 | 79945  | 4.87 | 51            | 2               | 1                |
| CAN8_HUMAN  | Calpain-8                                                   | 79144  | 5.10 | 35            | 1               | 1                |
| CLIP1_HUMAN | CAP-Gly domain-containing linker protein 1                  | 162147 | 5.29 | 49            | 2               | 1                |
| CLIP3_HUMAN | CAP-Gly domain-containing linker protein 3                  | 59560  | 7.93 | 35            | 1               | 1                |
| CAH1_HUMAN  | Carbonic anhydrase 1                                        | 28852  | 6.59 | 279           | 9               | 8                |
| CAH2_HUMAN  | Carbonic anhydrase 2                                        | 29228  | 6.87 | 77            | 1               | 1                |
| EST5A_HUMAN | Carboxylesterase 5A                                         | 63926  | 5.98 | 37            | 1               | 1                |
| CBPB2_HUMAN | Carboxypeptidase B2                                         | 48393  | 7.61 | 106           | 6               | 5                |
| CBPN_HUMAN  | Carboxypeptidase N catalytic chain                          | 52253  | 6.86 | 131           | 3               | 3                |
| CPN2_HUMAN  | Carboxypeptidase N subunit 2                                | 60518  | 5.63 | 296           | 9               | 5                |
| CRAC1_HUMAN | Cartilage acidic protein 1                                  | 71376  | 4.95 | 45            | 1               | 1                |
| COMP_HUMAN  | Cartilage oligomeric matrix protein                         | 82808  | 4.36 | 35            | 1               | 1                |
| C8AP2_HUMAN | CASP8-associated protein 2                                  | 222520 | 6.14 | 42            | 2               | 1                |
| CAR10_HUMAN | Caspase recruitment domain-containing protein 10            | 115859 | 5.74 | 36            | 1               | 1                |
| CASPE_HUMAN | Caspase-14                                                  | 27662  | 5.44 | 69            | 2               | 1                |
| CASP8_HUMAN | Caspase-8                                                   | 55391  | 4.99 | 40            | 2               | 1                |
| CTND2_HUMAN | Catenin delta-2                                             | 132656 | 7.78 | 47            | 1               | 1                |
| CD44_HUMAN  | CD44 antigen                                                | 81487  | 5.13 | 35            | 1               | 1                |
| CP250_HUMAN | Centrosome-associated protein CEP250                        | 281137 | 5.00 | 35            | 1               | 1                |
| CERU_HUMAN  | Ceruloplasmin                                               | 122128 | 5.44 | 3898          | 131             | 37               |
| CH3L1_HUMAN | Chitinase-3-like protein 1                                  | 42598  | 8.69 | 41            | 2               | 1                |
| CHLE_HUMAN  | Cholinesterase                                              | 68374  | 7.12 | 268           | 10              | 9                |
| CHD7_HUMAN  | Chromodomain-helicase-DNA-binding protein 7                 | 335717 | 5.95 | 41            | 1               | 1                |
| CFA43_HUMAN | Cilia- and flagella-associated protein 43                   | 191861 | 5.71 | 41            | 1               | 1                |
| CLH1_HUMAN  | Clathrin heavy chain 1                                      | 191493 | 5.48 | 38            | 1               | 1                |
| CLH2_HUMAN  | Clathrin heavy chain 2                                      | 186910 | 5.57 | 39            | 1               | 1                |
| CLAP2_HUMAN | CLIP-associating protein 2                                  | 141046 | 8.62 | 37            | 1               | 1                |
| CLUS_HUMAN  | Clusterin                                                   | 52461  | 5.88 | 726           | 23              | 12               |
| FA9_HUMAN   | Coagulation factor IX                                       | 51745  | 5.34 | 109           | 3               | 3                |
| FA5_HUMAN   | Coagulation factor V                                        | 251546 | 5.68 | 64            | 1               | 1                |
| FA10_HUMAN  | Coagulation factor X                                        | 54697  | 5.68 | 145           | 5               | 3                |
| FA11_HUMAN  | Coagulation factor XI                                       | 70064  | 8.47 | 60            | 1               | 1                |
| FA12_HUMAN  | Coagulation factor XII                                      | 67748  | 8.04 | 70            | 4               | 4                |
| F13B_HUMAN  | Coagulation factor XIII B chain                             | 75461  | 6.01 | 254           | 8               | 6                |
| CC141_HUMAN | Coiled-coil domain-containing protein 141                   | 166157 | 5.41 | 45            | 3               | 1                |
| CC186_HUMAN | Coiled-coil domain-containing protein 186                   | 103687 | 5.94 | 37            | 1               | 1                |
| CCD89_HUMAN | Coiled-coil domain-containing protein 89                    | 43809  | 5.33 | 38            | 1               | 1                |

Table SII. Continued.

| Names       | Description                                             | MW, Da | pI   | Protein score | Peptide matches | Unique sequences |
|-------------|---------------------------------------------------------|--------|------|---------------|-----------------|------------------|
| CCD96_HUMAN | Coiled-coil domain-containing protein 96                | 62711  | 4.92 | 43            | 1               | 1                |
| COL11_HUMAN | Collectin-11                                            | 28647  | 5.26 | 40            | 1               | 1                |
| C1QA_HUMAN  | Complement C1q subcomponent subunit A                   | 26000  | 9.26 | 124           | 2               | 2                |
| C1QB_HUMAN  | Complement C1q subcomponent subunit B                   | 26704  | 8.83 | 467           | 12              | 4                |
| C1QC_HUMAN  | Complement C1q subcomponent subunit C                   | 25757  | 8.61 | 419           | 9               | 5                |
| C1R_HUMAN   | Complement C1r subcomponent                             | 80067  | 5.82 | 682           | 22              | 13               |
| C1RL_HUMAN  | Complement C1r subcomponent-like protein                | 53464  | 6.75 | 149           | 6               | 5                |
| C1S_HUMAN   | Complement C1s subcomponent                             | 76635  | 4.85 | 855           | 28              | 16               |
| CO2_HUMAN   | Complement C2                                           | 83214  | 7.23 | 698           | 23              | 15               |
| CO3_HUMAN   | Complement C3                                           | 187030 | 6.02 | 102           | 3               | 3                |
| CO4A_HUMAN  | Complement C4-A                                         | 192664 | 6.66 | 2936          | 90              | 44               |
| CO4B_HUMAN  | Complement C4-B                                         | 192631 | 6.89 | 3022          | 93              | 46               |
| CO5_HUMAN   | Complement C5                                           | 188186 | 6.11 | 1100          | 41              | 30               |
| CO6_HUMAN   | Complement component C6                                 | 104718 | 6.39 | 989           | 30              | 18               |
| CO7_HUMAN   | Complement component C7                                 | 93457  | 6.09 | 720           | 27              | 16               |
| CO8A_HUMAN  | Complement component C8 alpha chain                     | 65121  | 6.07 | 392           | 12              | 8                |
| CO8B_HUMAN  | Complement component C8 beta chain                      | 67003  | 8.50 | 452           | 16              | 13               |
| CO8G_HUMAN  | Complement component C8 gamma chain                     | 22264  | 8.49 | 661           | 18              | 9                |
| CO9_HUMAN   | Complement component C9                                 | 63133  | 5.43 | 802           | 25              | 14               |
| CFAB_HUMAN  | Complement factor B                                     | 85479  | 6.67 | 1664          | 56              | 26               |
| CFAD_HUMAN  | Complement factor D                                     | 27016  | 7.65 | 126           | 4               | 2                |
| CFAH_HUMAN  | Complement factor H                                     | 139005 | 6.21 | 1758          | 62              | 37               |
| FHR1_HUMAN  | Complement factor H-related protein 1                   | 37626  | 7.39 | 244           | 5               | 3                |
| FHR2_HUMAN  | Complement factor H-related protein 2                   | 30631  | 6.00 | 309           | 6               | 4                |
| FHR3_HUMAN  | Complement factor H-related protein 3                   | 37299  | 7.72 | 96            | 3               | 2                |
| FHR5_HUMAN  | Complement factor H-related protein 5                   | 64377  | 6.80 | 53            | 1               | 1                |
| CFAI_HUMAN  | Complement factor I                                     | 65707  | 7.72 | 1222          | 31              | 15               |
| CBG_HUMAN   | Corticosteroid-binding globulin                         | 45112  | 5.64 | 258           | 8               | 5                |
| CRP_HUMAN   | C-reactive protein                                      | 25023  | 5.45 | 268           | 8               | 4                |
| PYRG1_HUMAN | CTP synthase 1                                          | 66648  | 6.02 | 36            | 1               | 1                |
| CUZD1_HUMAN | CUB and zona pellucida-like domain-containing protein 1 | 68153  | 6.05 | 38            | 1               | 1                |
| C19L2_HUMAN | CWF19-like protein 2                                    | 103787 | 8.78 | 40            | 1               | 1                |
| CDK13_HUMAN | Cyclin-dependent kinase 13                              | 164923 | 9.71 | 37            | 1               | 1                |
| CYTA_HUMAN  | Cystatin-A                                              | 11000  | 5.38 | 67            | 1               | 1                |
| CYTC_HUMAN  | Cystatin-C                                              | 15789  | 9.00 | 65            | 1               | 1                |
| CRIS3_HUMAN | Cysteine-rich secretory protein 3                       | 27612  | 8.09 | 106           | 4               | 3                |
| CREL1_HUMAN | Cysteine-rich with EGF-like domain protein 1            | 45409  | 4.81 | 38            | 1               | 1                |
| QCR2_HUMAN  | Cytochrome b-c1 complex subunit 2, mitochondrial        | 48413  | 8.74 | 37            | 1               | 1                |
| CP4FN_HUMAN | Cytochrome P450 4F22                                    | 61958  | 8.95 | 38            | 1               | 1                |
| DYHC1_HUMAN | Cytoplasmic dynein 1 heavy chain 1                      | 532072 | 6.01 | 43            | 1               | 1                |
| CPEB3_HUMAN | Cytoplasmic polyadenylation element-binding protein 3   | 76014  | 6.56 | 37            | 1               | 1                |
| NCK2_HUMAN  | Cytoplasmic protein NCK2                                | 42915  | 6.49 | 37            | 1               | 1                |
| 5NT3A_HUMAN | Cytosolic 5'-nucleotidase 3A                            | 37924  | 6.67 | 36            | 1               | 1                |
| BDH_HUMAN   | D-beta-hydroxybutyrate dehydrogenase, mitochondrial     | 38157  | 9.10 | 45            | 1               | 1                |
| DOC10_HUMAN | Dedicator of cytokinesis protein 10                     | 249373 | 6.72 | 35            | 1               | 1                |
| DOCK8_HUMAN | Dedicator of cytokinesis protein 8                      | 238377 | 6.43 | 38            | 1               | 1                |
| DLL1_HUMAN  | Delta-like protein 1                                    | 78004  | 5.85 | 36            | 1               | 1                |
| DCD_HUMAN   | Dermcidin                                               | 11277  | 6.09 | 190           | 5               | 4                |
| DESM_HUMAN  | Desmin                                                  | 53536  | 5.21 | 38            | 1               | 1                |
| DSC1_HUMAN  | Desmocollin-1                                           | 99924  | 5.25 | 52            | 1               | 1                |

Table SII. Continued.

| Names       | Description                                                    | MW, Da | pI   | Protein score | Peptide matches | Unique sequences |
|-------------|----------------------------------------------------------------|--------|------|---------------|-----------------|------------------|
| DSG1_HUMAN  | Desmoglein-1                                                   | 113676 | 4.90 | 74            | 1               | 1                |
| DESP_HUMAN  | Desmoplakin                                                    | 331569 | 6.44 | 142           | 6               | 6                |
| DGKH_HUMAN  | Diacylglycerol kinase eta                                      | 134866 | 6.11 | 38            | 1               | 1                |
| DPYD_HUMAN  | Dihydropyrimidine dehydrogenase [NADP(+)]                      | 111329 | 6.80 | 38            | 1               | 1                |
| ERC6L_HUMAN | DNA excision repair protein ERCC-6-like                        | 141103 | 5.19 | 37            | 1               | 1                |
| MLH3_HUMAN  | DNA mismatch repair protein Mlh3                               | 163607 | 6.33 | 42            | 1               | 1                |
| REV3L_HUMAN | DNA polymerase zeta catalytic subunit                          | 352554 | 8.72 | 38            | 1               | 1                |
| RPC1_HUMAN  | DNA-directed RNA polymerase III subunit RPC1                   | 155542 | 8.76 | 40            | 1               | 1                |
| DOPO_HUMAN  | Dopamine beta-hydroxylase                                      | 69021  | 5.97 | 42            | 1               | 1                |
| TESK2_HUMAN | Dual specificity testis-specific protein kinase 2              | 63639  | 6.63 | 40            | 1               | 1                |
| DYR1A_HUMAN | Dual specificity tyrosine-phosphorylation-regulated kinase 1A  | 85584  | 8.90 | 35            | 1               | 1                |
| DYH3_HUMAN  | Dynein heavy chain 3, axonemal                                 | 470468 | 6.04 | 38            | 1               | 1                |
| DYH7_HUMAN  | Dynein heavy chain 7, axonemal                                 | 460862 | 5.70 | 38            | 1               | 1                |
| DYST_HUMAN  | Dystonin                                                       | 860127 | 5.14 | 44            | 1               | 1                |
| RBP2_HUMAN  | E3 SUMO-protein ligase RanBP2                                  | 357974 | 5.86 | 41            | 2               | 1                |
| HECW1_HUMAN | E3 ubiquitin-protein ligase HECW1                              | 179554 | 5.33 | 36            | 1               | 1                |
| RN149_HUMAN | E3 ubiquitin-protein ligase RNF149                             | 43137  | 6.08 | 35            | 1               | 1                |
| RN213_HUMAN | E3 ubiquitin-protein ligase RNF213                             | 591030 | 6.05 | 41            | 1               | 1                |
| TRI47_HUMAN | E3 ubiquitin-protein ligase TRIM47                             | 69532  | 6.03 | 35            | 1               | 1                |
| XIAP_HUMAN  | E3 ubiquitin-protein ligase XIAP                               | 56648  | 6.22 | 43            | 1               | 1                |
| EMAL2_HUMAN | Echinoderm microtubule-associated protein-like 2               | 70634  | 5.86 | 49            | 2               | 1                |
| EFTS_HUMAN  | Elongation factor Ts, mitochondrial                            | 35391  | 8.62 | 35            | 1               | 1                |
| MECR_HUMAN  | Enoyl-[acyl-carrier-protein] reductase, mitochondrial          | 40436  | 8.99 | 39            | 1               | 1                |
| ECHD2_HUMAN | Enoyl-CoA hydratase domain-containing protein 2, mitochondrial | 31106  | 9.03 | 37            | 1               | 1                |
| EMC10_HUMAN | ER membrane protein complex subunit 10                         | 27347  | 5.78 | 36            | 1               | 1                |
| EPOR_HUMAN  | Erythropoietin receptor                                        | 55031  | 4.64 | 35            | 1               | 1                |
| ECM1_HUMAN  | Extracellular matrix protein 1                                 | 60635  | 6.25 | 91            | 2               | 1                |
| FRAS1_HUMAN | Extracellular matrix protein FRAS1                             | 442928 | 5.32 | 45            | 1               | 1                |
| SODE_HUMAN  | Extracellular superoxide dismutase [Cu-Zn]                     | 25835  | 6.13 | 48            | 1               | 1                |
| FANCI_HUMAN | Fanconi anemia group I protein                                 | 149229 | 6.31 | 43            | 1               | 1                |
| FAN1_HUMAN  | Fanconi-associated nuclease 1                                  | 114152 | 7.10 | 45            | 1               | 1                |
| FABP5_HUMAN | Fatty acid-binding protein 5                                   | 15155  | 6.59 | 37            | 1               | 1                |
| FBX43_HUMAN | F-box only protein 43                                          | 78402  | 8.40 | 35            | 1               | 1                |
| FRPD1_HUMAN | FERM and PDZ domain-containing protein 1                       | 173437 | 5.14 | 46            | 1               | 1                |
| FETUB_HUMAN | Fetuin-B                                                       | 42028  | 6.46 | 57            | 2               | 1                |
| FIBA_HUMAN  | Fibrinogen alpha chain                                         | 94914  | 5.70 | 96            | 3               | 2                |
| FIBG_HUMAN  | Fibrinogen gamma chain                                         | 51479  | 5.37 | 55            | 1               | 1                |
| FINC_HUMAN  | Fibronectin                                                    | 262460 | 5.46 | 3431          | 115             | 50               |
| FBLN1_HUMAN | Fibulin-1                                                      | 77162  | 5.07 | 102           | 4               | 4                |
| FCN3_HUMAN  | Ficolin-3                                                      | 32882  | 6.20 | 533           | 12              | 7                |
| FILA2_HUMAN | Filaggrin-2                                                    | 247928 | 8.45 | 71            | 1               | 1                |
| FOLR2_HUMAN | Folate receptor beta                                           | 29280  | 7.50 | 35            | 1               | 1                |
| FOXN3_HUMAN | Forkhead box protein N3                                        | 53835  | 6.19 | 35            | 1               | 1                |
| FGD4_HUMAN  | FYVE, RhoGEF and PH domain-containing protein 4                | 86571  | 5.80 | 40            | 1               | 1                |
| LG3BP_HUMAN | Galectin-3-binding protein                                     | 65289  | 5.12 | 42            | 1               | 1                |
| CRYGS_HUMAN | Gamma-crystallin S                                             | 20993  | 6.43 | 45            | 1               | 1                |
| GSDME_HUMAN | Gasdermin-E                                                    | 54555  | 5.03 | 43            | 1               | 1                |
| GELS_HUMAN  | Gelsolin                                                       | 85644  | 5.90 | 1380          | 32              | 13               |
| GRDN_HUMAN  | Girdin                                                         | 215909 | 5.90 | 46            | 2               | 1                |
| GFAP_HUMAN  | Glial fibrillary acidic protein                                | 49850  | 5.42 | 113           | 1               | 1                |

Table SII. Continued.

| Names       | Description                                                   | MW, Da | pI    | Protein score | Peptide matches | Unique sequences |
|-------------|---------------------------------------------------------------|--------|-------|---------------|-----------------|------------------|
| GRIK4_HUMAN | Glutamate receptor ionotropic, kainate 4                      | 107176 | 6.30  | 39            | 1               | 1                |
| GPX3_HUMAN  | Glutathione peroxidase 3                                      | 25537  | 8.26  | 118           | 4               | 3                |
| G3P_HUMAN   | Glyceraldehyde-3-phosphate dehydrogenase                      | 36030  | 8.57  | 61            | 1               | 1                |
| GLRB_HUMAN  | Glycine receptor subunit beta                                 | 56086  | 9.03  | 36            | 1               | 1                |
| GTDC1_HUMAN | Glycosyltransferase-like domain-containing protein 1          | 52563  | 6.83  | 56            | 2               | 1                |
| GOGA4_HUMAN | Golgin subfamily A member 4                                   | 260980 | 5.33  | 39            | 2               | 1                |
| PIGT_HUMAN  | GPI transamidase component PIG-T                              | 65658  | 8.64  | 44            | 1               | 1                |
| GRAH_HUMAN  | Granzyme H                                                    | 27297  | 9.83  | 54            | 1               | 1                |
| GRAM_HUMAN  | Granzyme M                                                    | 27545  | 10.16 | 52            | 1               | 1                |
| GARE2_HUMAN | GRB2-associated and regulator of MAPK protein 2               | 92882  | 6.48  | 40            | 1               | 1                |
| GAB1_HUMAN  | GRB2-associated-binding protein 1                             | 76616  | 5.63  | 36            | 1               | 1                |
| GRAPL_HUMAN | GRB2-related adapter protein-like                             | 13442  | 7.89  | 35            | 1               | 1                |
| DKC1_HUMAN  | H/ACA ribonucleoprotein complex subunit DKC1                  | 57638  | 9.46  | 39            | 1               | 1                |
| HAUS3_HUMAN | HAUS augmin-like complex subunit 3                            | 69650  | 5.39  | 36            | 1               | 1                |
| HAUS4_HUMAN | HAUS augmin-like complex subunit 4                            | 42373  | 5.52  | 35            | 1               | 1                |
| HSF1_HUMAN  | Heat shock factor protein 1                                   | 57260  | 5.02  | 38            | 1               | 1                |
| HBA_HUMAN   | Hemoglobin subunit alpha                                      | 15248  | 8.72  | 54            | 1               | 1                |
| HBB_HUMAN   | Hemoglobin subunit beta                                       | 15988  | 6.74  | 70            | 1               | 1                |
| HEMO_HUMAN  | Hemopexin                                                     | 51643  | 6.55  | 2143          | 84              | 21               |
| HEP2_HUMAN  | Heparin cofactor 2                                            | 57034  | 6.41  | 560           | 20              | 12               |
| HGFA_HUMAN  | Hepatocyte growth factor activator                            | 70636  | 6.99  | 128           | 2               | 2                |
| HGFL_HUMAN  | Hepatocyte growth factor-like protein                         | 80268  | 7.98  | 72            | 1               | 1                |
| HNRDL_HUMAN | Heterogeneous nuclear ribonucleoprotein D-like                | 46409  | 9.59  | 39            | 1               | 1                |
| PDE9A_HUMAN | High affinity cGMP-specific 3',5'-cyclic phosphodiesterase 9A | 68493  | 5.85  | 37            | 1               | 1                |
| HRG_HUMAN   | Histidine-rich glycoprotein                                   | 59541  | 7.09  | 553           | 15              | 8                |
| H11_HUMAN   | Histone H1.1                                                  | 21829  | 10.99 | 76            | 1               | 1                |
| H12_HUMAN   | Histone H1.2                                                  | 21352  | 10.94 | 76            | 1               | 1                |
| H13_HUMAN   | Histone H1.3                                                  | 22336  | 11.02 | 58            | 1               | 1                |
| H15_HUMAN   | Histone H1.5                                                  | 22580  | 10.91 | 39            | 1               | 1                |
| H1T_HUMAN   | Histone H1t                                                   | 22006  | 11.71 | 76            | 1               | 1                |
| H2AV_HUMAN  | Histone H2A.V                                                 | 13501  | 10.58 | 35            | 1               | 1                |
| H4_HUMAN    | Histone H4                                                    | 11360  | 11.36 | 51            | 1               | 1                |
| KMT2D_HUMAN | Histone-lysine N-methyltransferase 2D                         | 593017 | 5.40  | 37            | 1               | 1                |
| EHMT2_HUMAN | Histone-lysine N-methyltransferase EHMT2                      | 132370 | 5.30  | 38            | 1               | 1                |
| SIX4_HUMAN  | Homeobox protein SIX4                                         | 82933  | 5.45  | 40            | 1               | 1                |
| HORN_HUMAN  | Hornerin                                                      | 282228 | 10.05 | 130           | 3               | 2                |
| HABP2_HUMAN | Hyaluronan-binding protein 2                                  | 62630  | 6.09  | 99            | 3               | 3                |
| IGHA1_HUMAN | Ig alpha-1 chain C region                                     | 37631  | 6.08  | 47            | 1               | 1                |
| IGHG1_HUMAN | Ig gamma-1 chain C region                                     | 36083  | 8.46  | 54            | 1               | 1                |
| IGKC_HUMAN  | Ig kappa chain C region                                       | 11602  | 6.11  | 132           | 2               | 1                |
| FCGBP_HUMAN | IgGFc-binding protein                                         | 571639 | 5.14  | 61            | 2               | 2                |
| IGLC2_HUMAN | Immunoglobulin lambda constant 2                              | 11287  | 6.91  | 55            | 1               | 1                |
| IGLC6_HUMAN | Immunoglobulin lambda constant 6                              | 11270  | 6.91  | 42            | 1               | 1                |
| IGLL5_HUMAN | Immunoglobulin lambda-like polypeptide 5                      | 23049  | 9.08  | 42            | 1               | 1                |
| GT253_HUMAN | Inactive glycosyltransferase 25 family member 3               | 67592  | 5.70  | 36            | 1               | 1                |
| INCE_HUMAN  | Inner centromere protein                                      | 105429 | 9.46  | 35            | 1               | 1                |
| INP5K_HUMAN | Inositol polyphosphate 5-phosphatase K                        | 51058  | 6.07  | 37            | 1               | 1                |
| IRS1_HUMAN  | Insulin receptor substrate 1                                  | 131509 | 8.83  | 62            | 1               | 1                |
| IRS4_HUMAN  | Insulin receptor substrate 4                                  | 133685 | 8.72  | 40            | 1               | 1                |
| IGF2_HUMAN  | Insulin-like growth factor II                                 | 20127  | 9.50  | 67            | 1               | 1                |
| IBP3_HUMAN  | Insulin-like growth factor-binding protein 3                  | 31654  | 9.03  | 69            | 1               | 1                |

Table SII. Continued.

| Names       | Description                                                            | MW, Da | pI   | Protein score | Peptide matches | Unique sequences |
|-------------|------------------------------------------------------------------------|--------|------|---------------|-----------------|------------------|
| IBP6_HUMAN  | Insulin-like growth factor-binding protein 6                           | 25306  | 8.15 | 54            | 1               | 1                |
| ALS_HUMAN   | Insulin-like growth factor-binding protein complex acid labile subunit | 65994  | 6.33 | 398           | 13              | 13               |
| ITAM_HUMAN  | Integrin alpha-M                                                       | 127179 | 6.88 | 37            | 1               | 1                |
| ITIH1_HUMAN | Inter-alpha-trypsin inhibitor heavy chain H1                           | 101326 | 6.31 | 1903          | 48              | 19               |
| ITIH2_HUMAN | Inter-alpha-trypsin inhibitor heavy chain H2                           | 106397 | 6.40 | 2189          | 56              | 20               |
| ITIH3_HUMAN | Inter-alpha-trypsin inhibitor heavy chain H3                           | 99787  | 5.49 | 643           | 20              | 13               |
| ITIH4_HUMAN | Inter-alpha-trypsin inhibitor heavy chain H4                           | 103293 | 6.51 | 2266          | 69              | 24               |
| ITIH6_HUMAN | Inter-alpha-trypsin inhibitor heavy chain H6                           | 143098 | 9.10 | 41            | 1               | 1                |
| GVIN1_HUMAN | Interferon-induced very large GTPase 1                                 | 279048 | 6.12 | 35            | 1               | 1                |
| IL23R_HUMAN | Interleukin-23 receptor                                                | 71722  | 5.32 | 37            | 1               | 1                |
| IL6RB_HUMAN | Interleukin-6 receptor subunit beta                                    | 103471 | 5.62 | 43            | 1               | 1                |
| IFT46_HUMAN | Intraflagellar transport protein 46 homolog                            | 34265  | 4.37 | 42            | 1               | 1                |
| IDH3A_HUMAN | Isocitrate dehydrogenase [NAD] subunit alpha, mitochondrial            | 39592  | 6.46 | 36            | 1               | 1                |
| PLAK_HUMAN  | Junction plakoglobin                                                   | 81693  | 5.75 | 60            | 1               | 1                |
| JAM3_HUMAN  | Junctional adhesion molecule C                                         | 35020  | 7.53 | 39            | 1               | 1                |
| KLK10_HUMAN | Kallikrein-10                                                          | 30170  | 8.95 | 37            | 1               | 1                |
| KAIN_HUMAN  | Kallistatin                                                            | 48511  | 7.34 | 325           | 16              | 11               |
| KLH26_HUMAN | Kelch-like protein 26                                                  | 68096  | 6.04 | 43            | 1               | 1                |
| KPRP_HUMAN  | Keratinocyte proline-rich protein                                      | 64093  | 8.72 | 36            | 1               | 1                |
| KINH_HUMAN  | Kinesin-1 heavy chain                                                  | 109617 | 6.12 | 45            | 1               | 1                |
| KI18A_HUMAN | Kinesin-like protein KIF18A                                            | 102216 | 9.09 | 42            | 2               | 1                |
| KNTC1_HUMAN | Kinetochores-associated protein 1                                      | 250749 | 5.67 | 35            | 1               | 1                |
| KNG1_HUMAN  | Kininogen-1                                                            | 71912  | 6.34 | 939           | 32              | 15               |
| LAMA1_HUMAN | Laminin subunit alpha-1                                                | 337084 | 5.93 | 36            | 1               | 1                |
| LAMA5_HUMAN | Laminin subunit alpha-5                                                | 399479 | 6.66 | 39            | 1               | 1                |
| LURA1_HUMAN | Leucine rich adaptor protein 1                                         | 25806  | 4.74 | 39            | 1               | 1                |
| A2GL_HUMAN  | Leucine-rich alpha-2-glycoprotein                                      | 38154  | 6.45 | 302           | 10              | 6                |
| LRC31_HUMAN | Leucine-rich repeat-containing protein 31                              | 61450  | 5.71 | 39            | 1               | 1                |
| LRC47_HUMAN | Leucine-rich repeat-containing protein 47                              | 63434  | 8.55 | 38            | 1               | 1                |
| LIMC1_HUMAN | LIM and calponin homology domains-containing protein 1                 | 121867 | 6.10 | 41            | 1               | 1                |
| LIMA1_HUMAN | LIM domain and actin-binding protein 1                                 | 85226  | 6.41 | 39            | 2               | 1                |
| LBP_HUMAN   | Lipopolysaccharide-binding protein                                     | 53350  | 6.23 | 152           | 6               | 5                |
| LOXH1_HUMAN | Lipoxygenase homology domain-containing protein 1                      | 221807 | 5.38 | 45            | 1               | 1                |
| LIPA3_HUMAN | Liprin-alpha-3                                                         | 133496 | 5.53 | 35            | 1               | 1                |
| LDHA_HUMAN  | L-lactate dehydrogenase A chain                                        | 36665  | 8.44 | 39            | 1               | 1                |
| S27A6_HUMAN | Long-chain fatty acid transport protein 6                              | 70067  | 8.75 | 43            | 3               | 1                |
| ACSL6_HUMAN | Long-chain-fatty-acid-CoA ligase 6                                     | 77752  | 7.20 | 64            | 3               | 1                |
| ACBG2_HUMAN | Long-chain-fatty-acid-CoA ligase ACSBG2                                | 74306  | 8.67 | 38            | 1               | 1                |
| FCG3A_HUMAN | Low affinity immunoglobulin gamma Fc region receptor III-A             | 29071  | 8.20 | 40            | 1               | 1                |
| LYAM1_HUMAN | L-selectin                                                             | 42159  | 6.20 | 89            | 3               | 3                |
| LUM_HUMAN   | Lumican                                                                | 38405  | 6.16 | 433           | 14              | 9                |
| KDM1A_HUMAN | Lysine-specific histone demethylase 1A                                 | 92903  | 6.11 | 38            | 1               | 1                |
| LAMP2_HUMAN | Lysosome-associated membrane glycoprotein 2                            | 44932  | 5.35 | 59            | 1               | 1                |
| LYSC_HUMAN  | Lysozyme C                                                             | 16526  | 9.38 | 77            | 2               | 1                |
| CSF1R_HUMAN | Macrophage colony-stimulating factor 1 receptor                        | 107915 | 5.93 | 38            | 1               | 1                |
| MASP1_HUMAN | Mannan-binding lectin serine protease 1                                | 79195  | 5.29 | 104           | 4               | 1                |
| MBL2_HUMAN  | Mannose-binding protein C                                              | 26127  | 5.39 | 517           | 13              | 7                |
| MA1C1_HUMAN | Mannosyl-oligosaccharide 1,2-alpha-mannosidase IC                      | 70911  | 7.01 | 40            | 2               | 1                |

Table SII. Continued.

| Names       | Description                                                  | MW, Da | pI    | Protein score | Peptide matches | Unique sequences |
|-------------|--------------------------------------------------------------|--------|-------|---------------|-----------------|------------------|
| MATN4_HUMAN | Matrilin-4                                                   | 68487  | 5.73  | 35            | 1               | 1                |
| MBTD1_HUMAN | MBT domain-containing protein 1                              | 70502  | 7.96  | 35            | 1               | 1                |
| MED23_HUMAN | Mediator of RNA polymerase II transcription subunit 23       | 156474 | 7.09  | 39            | 2               | 1                |
| MEIOC_HUMAN | Meiosis-specific coiled-coil domain-containing protein MEIOC | 107559 | 6.68  | 46            | 2               | 1                |
| TIMP1_HUMAN | Metalloproteinase inhibitor 1                                | 23156  | 8.46  | 82            | 2               | 2                |
| MCPH1_HUMAN | Microcephalin                                                | 92818  | 8.56  | 36            | 1               | 1                |
| MACF1_HUMAN | Microtubule-actin cross-linking factor 1, isoforms 1/2/3/5   | 837787 | 5.28  | 36            | 1               | 1                |
| MAST4_HUMAN | Microtubule-associated serine/threonine-protein kinase 4     | 284202 | 8.85  | 38            | 1               | 1                |
| S2542_HUMAN | Mitochondrial coenzyme A transporter SLC25A42                | 35387  | 10.08 | 38            | 1               | 1                |
| MK13_HUMAN  | Mitogen-activated protein kinase 13                          | 42090  | 8.48  | 35            | 1               | 1                |
| CD14_HUMAN  | Monocyte differentiation antigen CD14                        | 40051  | 5.84  | 67            | 1               | 1                |
| CAPAM_HUMAN | mRNA (2'-O-methyladenosine-N(6)-methyltransferase            | 80670  | 7.09  | 35            | 1               | 1                |
| MCE1_HUMAN  | mRNA-capping enzyme                                          | 68513  | 8.43  | 54            | 1               | 1                |
| MMRN1_HUMAN | Multimerin-1                                                 | 138023 | 8.15  | 35            | 1               | 1                |
| MYBA_HUMAN  | Myb-related protein A                                        | 85833  | 6.69  | 39            | 1               | 1                |
| MYT1_HUMAN  | Myelin transcription factor 1                                | 122254 | 4.81  | 41            | 1               | 1                |
| MYLK_HUMAN  | Myosin light chain kinase, smooth muscle                     | 210583 | 5.85  | 41            | 2               | 1                |
| MYH11_HUMAN | Myosin-11                                                    | 227199 | 5.42  | 45            | 2               | 1                |
| MYPC1_HUMAN | Myosin-binding protein C, slow-type                          | 128214 | 5.78  | 37            | 1               | 1                |
| MTA70_HUMAN | N6-adenosine-methyltransferase catalytic subunit             | 64474  | 5.98  | 37            | 1               | 1                |
| PGRP2_HUMAN | N-acetylmuramoyl-L-alanine amidase                           | 62178  | 7.25  | 290           | 8               | 6                |
| NAPEP_HUMAN | N-acyl-phosphatidylethanolamine-hydrolyzing phospholipase D  | 45566  | 5.71  | 40            | 1               | 1                |
| NCKPL_HUMAN | Nck-associated protein 1-like                                | 128153 | 6.39  | 47            | 1               | 1                |
| N4BP1_HUMAN | NEDD4-binding protein 1                                      | 100379 | 5.24  | 35            | 1               | 1                |
| NCAM1_HUMAN | Neural cell adhesion molecule 1                              | 94515  | 4.79  | 65            | 1               | 1                |
| NCHL1_HUMAN | Neural cell adhesion molecule L1-like protein                | 134987 | 5.51  | 44            | 1               | 1                |
| NBAS_HUMAN  | Neuroblastoma-amplified sequence                             | 268401 | 5.65  | 39            | 1               | 1                |
| NFH_HUMAN   | Neurofilament heavy polypeptide                              | 112411 | 5.99  | 62            | 1               | 1                |
| NAV2_HUMAN  | Neuron navigator 2                                           | 268003 | 9.13  | 36            | 1               | 1                |
| DCX_HUMAN   | Neuronal migration protein doublecortin                      | 40548  | 9.33  | 44            | 1               | 1                |
| NRP1_HUMAN  | Neuropilin-1                                                 | 103069 | 5.58  | 44            | 1               | 1                |
| GANAB_HUMAN | Neutral alpha-glucosidase AB                                 | 106874 | 5.74  | 36            | 1               | 1                |
| GANC_HUMAN  | Neutral alpha-glucosidase C                                  | 104268 | 5.82  | 45            | 3               | 1                |
| NCF2_HUMAN  | Neutrophil cytosol factor 2                                  | 59762  | 5.88  | 35            | 1               | 1                |
| DEF1_HUMAN  | Neutrophil defensin 1                                        | 10194  | 6.54  | 161           | 4               | 2                |
| NGAL_HUMAN  | Neutrophil gelatinase-associated lipocalin                   | 22574  | 9.02  | 69            | 1               | 1                |
| SMYD2_HUMAN | N-lysine methyltransferase SMYD2                             | 49688  | 6.27  | 35            | 1               | 1                |
| NU153_HUMAN | Nuclear pore complex protein Nup153                          | 153938 | 8.97  | 65            | 2               | 1                |
| NUP98_HUMAN | Nuclear pore complex protein Nup98-Nup96                     | 197457 | 5.97  | 43            | 1               | 1                |
| NCOA3_HUMAN | Nuclear receptor coactivator 3                               | 155195 | 7.16  | 37            | 1               | 1                |
| O6C74_HUMAN | Olfactory receptor 6C74                                      | 35230  | 8.95  | 42            | 2               | 1                |
| PAX5_HUMAN  | Paired box protein Pax-5                                     | 42149  | 9.08  | 35            | 1               | 1                |
| AMYP_HUMAN  | Pancreatic alpha-amylase                                     | 57670  | 6.60  | 156           | 3               | 2                |
| PI16_HUMAN  | Peptidase inhibitor 16                                       | 49440  | 5.24  | 60            | 1               | 1                |
| PCNT_HUMAN  | Pericentrin                                                  | 377806 | 5.40  | 40            | 1               | 1                |
| PRDX1_HUMAN | Peroxiredoxin-1                                              | 22096  | 8.27  | 35            | 1               | 1                |
| PRDX2_HUMAN | Peroxiredoxin-2                                              | 21878  | 5.66  | 48            | 2               | 2                |
| OCTC_HUMAN  | Peroxisomal carnitine O-octanoyltransferase                  | 70133  | 6.63  | 36            | 1               | 1                |

Table SII. Continued.

| Names       | Description                                                                 | MW, Da | pI    | Protein score | Peptide matches | Unique sequences |
|-------------|-----------------------------------------------------------------------------|--------|-------|---------------|-----------------|------------------|
| PEX1_HUMAN  | Peroxisome biogenesis factor 1                                              | 142867 | 5.91  | 39            | 1               | 1                |
| PSD3_HUMAN  | PH and SEC7 domain-containing protein 3                                     | 115962 | 5.68  | 35            | 1               | 1                |
| LCAT_HUMAN  | Phosphatidylcholine-sterol acyltransferase                                  | 49546  | 5.71  | 40            | 1               | 1                |
| PREX1_HUMAN | Phosphatidylinositol 3,4,5-trisphosphate-dependent Rac exchanger 1 protein  | 186085 | 6.03  | 35            | 1               | 1                |
| PI4KA_HUMAN | Phosphatidylinositol 4-kinase alpha                                         | 236830 | 6.64  | 35            | 1               | 1                |
| P3C2B_HUMAN | Phosphatidylinositol 4-phosphate 3-kinase C2 domain-containing subunit beta | 184651 | 6.95  | 35            | 1               | 1                |
| PEDF_HUMAN  | Pigment epithelium-derived factor                                           | 46283  | 5.97  | 679           | 16              | 11               |
| PKP1_HUMAN  | Plakophilin-1                                                               | 82808  | 9.29  | 50            | 1               | 1                |
| PKP2_HUMAN  | Plakophilin-2                                                               | 97355  | 9.39  | 42            | 1               | 1                |
| KLKB1_HUMAN | Plasma kallikrein                                                           | 71323  | 8.60  | 458           | 13              | 10               |
| AT2B4_HUMAN | Plasma membrane calcium-transporting ATPase 4                               | 137920 | 6.19  | 35            | 1               | 1                |
| IC1_HUMAN   | Plasma protease C1 inhibitor                                                | 55119  | 6.09  | 513           | 18              | 11               |
| IPSP_HUMAN  | Plasma serine protease inhibitor                                            | 45646  | 9.30  | 225           | 6               | 5                |
| PLMN_HUMAN  | Plasminogen                                                                 | 90510  | 7.04  | 1588          | 59              | 27               |
| PLGB_HUMAN  | Plasminogen-like protein B                                                  | 10964  | 6.11  | 37            | 1               | 1                |
| CXCL7_HUMAN | Platelet basic protein                                                      | 13885  | 9.04  | 650           | 16              | 6                |
| PF4V_HUMAN  | Platelet factor 4 variant                                                   | 11545  | 9.30  | 50            | 1               | 1                |
| GP1BA_HUMAN | Platelet glycoprotein Ib alpha chain                                        | 71495  | 5.87  | 65            | 2               | 2                |
| PLXC1_HUMAN | Plexin-C1                                                                   | 175630 | 7.78  | 37            | 1               | 1                |
| PTBP1_HUMAN | Polypyrimidine tract-binding protein 1                                      | 57221  | 9.22  | 62            | 3               | 1                |
| PZP_HUMAN   | Pregnancy zone protein                                                      | 163760 | 5.97  | 440           | 14              | 13               |
| DDX58_HUMAN | Probable ATP-dependent RNA helicase DDX58                                   | 106531 | 6.03  | 37            | 1               | 1                |
| HERC1_HUMAN | Probable E3 ubiquitin-protein ligase HERC1                                  | 532228 | 5.69  | 40            | 1               | 1                |
| PCOC1_HUMAN | Procollagen C-endopeptidase enhancer 1                                      | 47972  | 7.41  | 35            | 2               | 1                |
| PENK_HUMAN  | Proenkephalin-A                                                             | 30787  | 5.44  | 40            | 1               | 1                |
| PIP_HUMAN   | Prolactin-inducible protein                                                 | 16562  | 8.26  | 109           | 2               | 2                |
| PRELP_HUMAN | Prolargin                                                                   | 43782  | 9.47  | 35            | 1               | 1                |
| PRR30_HUMAN | Proline-rich protein 30                                                     | 44662  | 10.39 | 44            | 2               | 1                |
| SEPR_HUMAN  | Prolyl endopeptidase FAP                                                    | 87657  | 6.21  | 39            | 1               | 1                |
| PROP_HUMAN  | Properdin                                                                   | 51242  | 8.32  | 37            | 1               | 1                |
| PTGDS_HUMAN | Prostaglandin-H2 D-isomerase                                                | 21015  | 7.66  | 149           | 3               | 1                |
| AMBP_HUMAN  | Protein AMBP                                                                | 38974  | 5.95  | 767           | 17              | 8                |
| BICD2_HUMAN | Protein bicaudal D homolog 2                                                | 93476  | 5.35  | 41            | 1               | 1                |
| C2D2B_HUMAN | Protein CC2D2B                                                              | 122955 | 6.68  | 45            | 1               | 1                |
| DIAP3_HUMAN | Protein diaphanous homolog 3                                                | 136926 | 6.64  | 38            | 1               | 1                |
| F102A_HUMAN | Protein FAM102A                                                             | 41759  | 8.83  | 41            | 1               | 1                |
| F219A_HUMAN | Protein FAM219A                                                             | 20400  | 4.53  | 38            | 1               | 1                |
| FAM74_HUMAN | Protein FAM74A4/A6                                                          | 14773  | 10.66 | 39            | 1               | 1                |
| HID1_HUMAN  | Protein HID1                                                                | 88689  | 5.69  | 53            | 1               | 1                |
| KPCI_HUMAN  | Protein kinase C iota type                                                  | 68262  | 5.54  | 36            | 1               | 1                |
| LIAT1_HUMAN | Protein LIAT1                                                               | 49656  | 7.79  | 36            | 1               | 1                |
| PAR14_HUMAN | Protein mono-ADP-ribosyltransferase PARP14                                  | 202672 | 6.81  | 35            | 1               | 1                |
| PAR15_HUMAN | Protein mono-ADP-ribosyltransferase PARP15                                  | 74529  | 9.02  | 38            | 1               | 1                |
| PP14D_HUMAN | Protein phosphatase 1 regulatory subunit 14D                                | 16497  | 7.72  | 38            | 1               | 1                |
| PPR27_HUMAN | Protein phosphatase 1 regulatory subunit 27                                 | 17427  | 6.51  | 54            | 1               | 1                |
| PR14L_HUMAN | Protein PRR14L                                                              | 237300 | 5.93  | 37            | 1               | 1                |
| S10A2_HUMAN | Protein S100-A2                                                             | 11109  | 4.68  | 42            | 1               | 1                |
| S10A7_HUMAN | Protein S100-A7                                                             | 11464  | 6.27  | 59            | 1               | 1                |
| S10A8_HUMAN | Protein S100-A8                                                             | 10828  | 6.50  | 272           | 12              | 5                |
| S10A9_HUMAN | Protein S100-A9                                                             | 13234  | 5.71  | 142           | 5               | 4                |
| SLN14_HUMAN | Protein SLFN14                                                              | 103840 | 8.57  | 39            | 1               | 1                |
| SC61G_HUMAN | Protein transport protein Sec61 subunit gamma                               | 7741   | 10.01 | 45            | 4               | 1                |

Table SII. Continued.

| Names       | Description                                                       | MW, Da | pI    | Protein score | Peptide matches | Unique sequences |
|-------------|-------------------------------------------------------------------|--------|-------|---------------|-----------------|------------------|
| YIPF3_HUMAN | Protein YIPF3                                                     | 38223  | 5.47  | 35            | 1               | 1                |
| ZPI_HUMAN   | Protein Z-dependent protease inhibitor                            | 50674  | 8.28  | 121           | 2               | 2                |
| ZN767_HUMAN | Protein ZNF767                                                    | 17225  | 9.66  | 43            | 1               | 1                |
| PRG4_HUMAN  | Proteoglycan 4                                                    | 150984 | 9.54  | 42            | 1               | 1                |
| THRB_HUMAN  | Prothrombin                                                       | 69992  | 5.63  | 1315          | 37              | 15               |
| PCL11_HUMAN | PTB-containing, cubilin and LRP1-interacting protein              | 28272  | 6.53  | 48            | 1               | 1                |
| PSA_HUMAN   | Puromycin-sensitive aminopeptidase                                | 103276 | 5.49  | 37            | 1               | 1                |
| ANR31_HUMAN | Putative ankyrin repeat domain-containing protein 31              | 210685 | 5.82  | 35            | 1               | 1                |
| CROL2_HUMAN | Putative ciliary rootlet coiled-coil protein-like 2 protein       | 33334  | 10.84 | 47            | 1               | 1                |
| HSP77_HUMAN | Putative heat shock 70 kDa protein 7                              | 40220  | 7.72  | 48            | 1               | 1                |
| HYI_HUMAN   | Putative hydroxypyruvate isomerase                                | 30387  | 5.36  | 62            | 2               | 1                |
| MST1L_HUMAN | Putative macrophage stimulating 1-like protein                    | 79642  | 8.16  | 48            | 1               | 1                |
| PI4P2_HUMAN | Putative phosphatidylinositol 4-kinase alpha-like protein P2      | 66944  | 6.68  | 35            | 1               | 1                |
| ASXL1_HUMAN | Putative Polycomb group protein ASXL1                             | 165345 | 5.85  | 37            | 2               | 1                |
| ATPUN_HUMAN | Putative protein ATP11AUN                                         | 13416  | 8.66  | 35            | 1               | 1                |
| P5CR2_HUMAN | Pyrroline-5-carboxylate reductase 2                               | 33616  | 7.66  | 44            | 1               | 1                |
| RABE1_HUMAN | Rab GTPase-binding effector protein 1                             | 99229  | 4.95  | 36            | 1               | 1                |
| RFTN1_HUMAN | Raftlin                                                           | 63146  | 5.46  | 37            | 1               | 1                |
| REPS1_HUMAN | RalBP1-associated Eps domain-containing protein 1                 | 86662  | 5.45  | 35            | 1               | 1                |
| RGPD1_HUMAN | RANBP2-like and GRIP domain-containing protein 1                  | 196539 | 5.80  | 41            | 2               | 1                |
| RGPD4_HUMAN | RANBP2-like and GRIP domain-containing protein 4                  | 197166 | 5.90  | 41            | 2               | 1                |
| RGPD5_HUMAN | RANBP2-like and GRIP domain-containing protein 5/6                | 198800 | 6.03  | 41            | 2               | 1                |
| RGPD8_HUMAN | RANBP2-like and GRIP domain-containing protein 8                  | 198869 | 6.09  | 36            | 1               | 1                |
| RPGF5_HUMAN | Rap guanine nucleotide exchange factor 5                          | 67733  | 5.89  | 35            | 1               | 1                |
| REEP5_HUMAN | Receptor expression-enhancing protein 5                           | 21479  | 8.25  | 56            | 1               | 1                |
| FLT3_HUMAN  | Receptor-type tyrosine-protein kinase FLT3                        | 112830 | 5.48  | 37            | 1               | 1                |
| PTPRE_HUMAN | Receptor-type tyrosine-protein phosphatase epsilon                | 80642  | 6.57  | 36            | 1               | 1                |
| RET4_HUMAN  | Retinol-binding protein 4                                         | 22995  | 5.76  | 1230          | 38              | 9                |
| ARHGH_HUMAN | Rho guanine nucleotide exchange factor 17                         | 221535 | 5.90  | 36            | 1               | 1                |
| ROCK2_HUMAN | Rho-associated protein kinase 2                                   | 160799 | 5.75  | 40            | 1               | 1                |
| GRK7_HUMAN  | Rhodopsin kinase                                                  | 62212  | 6.18  | 60            | 3               | 1                |
| RNAS1_HUMAN | Ribonuclease pancreatic                                           | 17633  | 9.10  | 42            | 1               | 1                |
| RIM3A_HUMAN | RIMS-binding protein 3A                                           | 180605 | 6.46  | 48            | 1               | 1                |
| M10L1_HUMAN | RNA helicase Mov1011                                              | 135207 | 6.07  | 36            | 1               | 1                |
| RMXL3_HUMAN | RNA-binding motif protein, X-linked-like-3                        | 114868 | 9.19  | 36            | 1               | 1                |
| RBM34_HUMAN | RNA-binding protein 34                                            | 48535  | 10.11 | 39            | 1               | 1                |
| CROCC_HUMAN | Rootletin                                                         | 228523 | 5.45  | 47            | 1               | 1                |
| RYR1_HUMAN  | Ryanodine receptor 1                                              | 564815 | 5.18  | 41            | 1               | 1                |
| TYW1_HUMAN  | S-adenosyl-L-methionine-dependent tRNA 4-demethylwyosine synthase | 83702  | 6.42  | 35            | 1               | 1                |
| C163A_HUMAN | Scavenger receptor cysteine-rich type 1 protein M130              | 125369 | 5.61  | 62            | 1               | 1                |
| SPP24_HUMAN | Secreted phosphoprotein 24                                        | 24322  | 8.59  | 46            | 1               | 1                |
| SPS1_HUMAN  | Selenide, water dikinase 1                                        | 42911  | 5.65  | 38            | 1               | 1                |



Table SII. Continued.

| Names       | Description                                                                                                  | MW, Da | pI    | Protein score | Peptide matches | Unique sequences |
|-------------|--------------------------------------------------------------------------------------------------------------|--------|-------|---------------|-----------------|------------------|
| SELH_HUMAN  | Selenoprotein H                                                                                              | 13453  | 9.76  | 35            | 1               | 1                |
| SEPP1_HUMAN | Selenoprotein P                                                                                              | 43156  | 8.08  | 90            | 1               | 1                |
| SRRM3_HUMAN | Serine/arginine repetitive matrix protein 3                                                                  | 65210  | 11.68 | 38            | 1               | 1                |
| ATR_HUMAN   | Serine/threonine-protein kinase ATR                                                                          | 301172 | 7.17  | 35            | 1               | 1                |
| NIM1_HUMAN  | Serine/threonine-protein kinase NIM1                                                                         | 49606  | 8.53  | 41            | 2               | 1                |
| PINK1_HUMAN | Serine/threonine-protein kinase PINK1, mitochondrial                                                         | 62729  | 9.43  | 37            | 1               | 1                |
| SBK1_HUMAN  | Serine/threonine-protein kinase SBK1                                                                         | 46252  | 9.28  | 35            | 1               | 1                |
| SPB12_HUMAN | Serpin B12                                                                                                   | 46247  | 5.36  | 36            | 1               | 1                |
| ALBU_HUMAN  | Serum albumin                                                                                                | 69321  | 5.92  | 307           | 11              | 10               |
| SAA1_HUMAN  | Serum amyloid A-1 protein                                                                                    | 13524  | 6.28  | 104           | 3               | 3                |
| SAA4_HUMAN  | Serum amyloid A-4 protein                                                                                    | 14737  | 9.17  | 115           | 3               | 2                |
| SAMP_HUMAN  | Serum amyloid P-component                                                                                    | 25371  | 6.10  | 697           | 19              | 7                |
| SHBG_HUMAN  | Sex hormone-binding globulin                                                                                 | 43752  | 6.22  | 131           | 4               | 2                |
| SPP2B_HUMAN | Signal peptide peptidase-like 2B                                                                             | 64644  | 8.67  | 37            | 1               | 1                |
| SCUB3_HUMAN | Signal peptide, CUB and EGF-like domain-containing protein 3                                                 | 109210 | 7.85  | 35            | 1               | 1                |
| STA5A_HUMAN | Signal transducer and activator of transcription 5A                                                          | 90590  | 5.98  | 36            | 1               | 1                |
| SMCO2_HUMAN | Single-pass membrane and coiled-coil domain-containing protein 2                                             | 39462  | 4.74  | 35            | 1               | 1                |
| UTP20_HUMAN | Small subunit processome component 20 homolog                                                                | 318182 | 7.07  | 38            | 1               | 1                |
| DGLB_HUMAN  | Sn1-specific diacylglycerol lipase beta                                                                      | 73684  | 6.09  | 36            | 1               | 1                |
| SCNBA_HUMAN | Sodium channel protein type 11 subunit alpha                                                                 | 204788 | 8.32  | 40            | 1               | 1                |
| S6A15_HUMAN | Sodium-dependent neutral amino acid transporter B(0)AT2                                                      | 81836  | 5.06  | 41            | 1               | 1                |
| S12A7_HUMAN | Solute carrier family 12 member 7                                                                            | 119029 | 6.28  | 37            | 1               | 1                |
| S7A13_HUMAN | Solute carrier family 7 member 13                                                                            | 52080  | 9.08  | 46            | 1               | 1                |
| SORT_HUMAN  | Sortilin                                                                                                     | 92009  | 5.46  | 65            | 2               | 1                |
| SPRC_HUMAN  | SPARC                                                                                                        | 34610  | 4.73  | 69            | 2               | 1                |
| SACA1_HUMAN | Sperm acrosome membrane-associated protein 1                                                                 | 32123  | 4.55  | 35            | 1               | 1                |
| SF3B1_HUMAN | Splicing factor 3B subunit 1                                                                                 | 145738 | 6.65  | 38            | 1               | 1                |
| SRCN1_HUMAN | SRC kinase signaling inhibitor 1                                                                             | 127105 | 9.39  | 39            | 1               | 1                |
| STA13_HUMAN | StAR-related lipid transfer protein 13                                                                       | 124889 | 6.57  | 40            | 1               | 1                |
| STAR9_HUMAN | StAR-related lipid transfer protein 9                                                                        | 516023 | 5.91  | 40            | 1               | 1                |
| SMC6_HUMAN  | Structural maintenance of chromosomes protein 6                                                              | 126246 | 6.57  | 37            | 1               | 1                |
| SODC_HUMAN  | Superoxide dismutase [Cu-Zn]                                                                                 | 15926  | 5.70  | 60            | 1               | 1                |
| SNED1_HUMAN | Sushi, nidogen and EGF-like domain-containing protein 1                                                      | 152204 | 6.59  | 35            | 1               | 1                |
| SMRCD_HUMAN | SWI/SNF-related matrix-associated actin-dependent regulator of chromatin subfamily A containing DEAD/H box 1 | 117402 | 5.39  | 42            | 1               | 1                |
| SYCP1_HUMAN | Synaptonemal complex protein 1                                                                               | 114192 | 5.78  | 37            | 1               | 1                |
| SYTL1_HUMAN | Synaptotagmin-like protein 1                                                                                 | 61857  | 5.32  | 35            | 1               | 1                |
| TARSH_HUMAN | Target of Nesh-SH3                                                                                           | 118569 | 9.48  | 38            | 1               | 1                |
| TEP1_HUMAN  | Telomerase protein component 1                                                                               | 290307 | 8.26  | 40            | 1               | 1                |
| TEN1_HUMAN  | Teneurin-1                                                                                                   | 304817 | 5.98  | 37            | 1               | 1                |
| TSG10_HUMAN | Testis-specific gene 10 protein                                                                              | 81370  | 5.73  | 45            | 3               | 1                |
| TETN_HUMAN  | Tetranectin                                                                                                  | 22522  | 5.52  | 631           | 15              | 7                |
| TTC14_HUMAN | Tetratricopeptide repeat protein 14                                                                          | 88265  | 8.77  | 39            | 1               | 1                |
| TT21B_HUMAN | Tetratricopeptide repeat protein 21B                                                                         | 150840 | 6.53  | 36            | 1               | 1                |
| TTC24_HUMAN | Tetratricopeptide repeat protein 24                                                                          | 63396  | 9.37  | 35            | 1               | 1                |
| TTC7A_HUMAN | Tetratricopeptide repeat protein 7A                                                                          | 96185  | 6.03  | 65            | 3               | 1                |
| THAP6_HUMAN | THAP domain-containing protein 6                                                                             | 25674  | 8.99  | 36            | 1               | 1                |
| THIO_HUMAN  | Thioredoxin                                                                                                  | 11730  | 4.82  | 62            | 1               | 1                |

Table SII. Continued.

| Names       | Description                                                          | MW, Da | pI   | Protein score | Peptide matches | Unique sequences |
|-------------|----------------------------------------------------------------------|--------|------|---------------|-----------------|------------------|
| THOC2_HUMAN | THO complex subunit 2                                                | 182659 | 8.67 | 42            | 1               | 1                |
| SYTM_HUMAN  | Threonine-tRNA ligase, mitochondrial                                 | 80985  | 6.90 | 36            | 1               | 1                |
| TSP1_HUMAN  | Thrombospondin-1                                                     | 129300 | 4.71 | 539           | 21              | 19               |
| TSP2_HUMAN  | Thrombospondin-2                                                     | 129908 | 4.62 | 51            | 2               | 2                |
| TSP3_HUMAN  | Thrombospondin-3                                                     | 104135 | 4.43 | 38            | 1               | 1                |
| THYG_HUMAN  | Thyroglobulin                                                        | 304594 | 5.40 | 52            | 2               | 1                |
| THA_HUMAN   | Thyroid hormone receptor alpha                                       | 54780  | 6.42 | 46            | 3               | 1                |
| TRIPB_HUMAN | Thyroid receptor-interacting protein 11                              | 227447 | 5.18 | 42            | 1               | 1                |
| THBG_HUMAN  | Thyroxine-binding globulin                                           | 46295  | 5.87 | 581           | 20              | 10               |
| TITIN_HUMAN | Titin                                                                | 4E+06  | 6.02 | 36            | 1               | 1                |
| TRAF2_HUMAN | TNF receptor-associated factor 2                                     | 55859  | 7.66 | 36            | 1               | 1                |
| TLR5_HUMAN  | Toll-like receptor 5                                                 | 97771  | 6.21 | 38            | 1               | 1                |
| TRAK2_HUMAN | Trafficking kinesin-binding protein 2                                | 101356 | 5.14 | 45            | 1               | 1                |
| TPPC9_HUMAN | Trafficking protein particle complex subunit 9                       | 128449 | 6.17 | 45            | 2               | 1                |
| TEFM_HUMAN  | Transcription elongation factor, mitochondrial                       | 41650  | 9.39 | 44            | 1               | 1                |
| AP2E_HUMAN  | Transcription factor AP-2-epsilon                                    | 46183  | 8.64 | 36            | 1               | 1                |
| ZEP2_HUMAN  | Transcription factor HIVEP2                                          | 268885 | 6.50 | 36            | 1               | 1                |
| ZEP3_HUMAN  | Transcription factor HIVEP3                                          | 259304 | 7.85 | 36            | 1               | 1                |
| TAF7L_HUMAN | Transcription initiation factor TFIID subunit 7-like                 | 52588  | 4.55 | 43            | 1               | 1                |
| TTF1_HUMAN  | Transcription termination factor 1                                   | 103051 | 9.41 | 36            | 1               | 1                |
| TGFB2_HUMAN | Transforming growth factor beta-2 proprotein                         | 47748  | 8.82 | 36            | 1               | 1                |
| TRPM4_HUMAN | Transient receptor potential cation channel subfamily M member 4     | 134215 | 8.49 | 38            | 1               | 1                |
| TMPS5_HUMAN | Transmembrane protease serine 5                                      | 49560  | 6.24 | 36            | 1               | 1                |
| TM115_HUMAN | Transmembrane protein 115                                            | 38172  | 8.31 | 39            | 1               | 1                |
| TTHY_HUMAN  | Transthyretin                                                        | 15877  | 5.49 | 74            | 1               | 1                |
| TNR6B_HUMAN | Trinucleotide repeat-containing gene 6B protein                      | 193883 | 6.31 | 35            | 1               | 1                |
| TRIM7_HUMAN | Tripartite motif-containing protein 7                                | 56595  | 7.81 | 49            | 1               | 1                |
| TRM6_HUMAN  | tRNA (adenine(58)-N(1))-methyltransferase non-catalytic subunit TRM6 | 55799  | 7.18 | 36            | 1               | 1                |
| SEN34_HUMAN | tRNA-splicing endonuclease subunit Sen34                             | 33631  | 8.53 | 37            | 1               | 1                |
| TDR15_HUMAN | Tudor domain-containing protein 15                                   | 221722 | 6.67 | 37            | 1               | 1                |
| TR11B_HUMAN | Tumor necrosis factor receptor superfamily member 11B                | 46026  | 8.66 | 45            | 2               | 1                |
| PTN1_HUMAN  | Tyrosine-protein phosphatase non-receptor type 1                     | 49935  | 5.88 | 43            | 1               | 1                |
| PTN11_HUMAN | Tyrosine-protein phosphatase non-receptor type 11                    | 68436  | 6.87 | 39            | 1               | 1                |
| PTN14_HUMAN | Tyrosine-protein phosphatase non-receptor type 14                    | 135261 | 8.53 | 38            | 1               | 1                |
| PTN21_HUMAN | Tyrosine-protein phosphatase non-receptor type 21                    | 133281 | 8.00 | 35            | 1               | 1                |
| IMP4_HUMAN  | U3 small nucleolar ribonucleoprotein protein IMP4                    | 33757  | 9.49 | 37            | 1               | 1                |
| UBP29_HUMAN | Ubiquitin carboxyl-terminal hydrolase 29                             | 104156 | 5.62 | 39            | 1               | 1                |
| UBP47_HUMAN | Ubiquitin carboxyl-terminal hydrolase 47                             | 157212 | 4.97 | 56            | 2               | 1                |
| RS27A_HUMAN | Ubiquitin-40S ribosomal protein S27a                                 | 17953  | 9.68 | 44            | 1               | 1                |
| CLBA1_HUMAN | Uncharacterized protein CLBA1                                        | 35668  | 5.96 | 35            | 1               | 1                |
| MYO15_HUMAN | Unconventional myosin-XV                                             | 395293 | 9.26 | 39            | 2               | 1                |
| K1324_HUMAN | UPF0577 protein KIAA1324                                             | 111382 | 6.13 | 36            | 1               | 1                |
| UROM_HUMAN  | Uromodulin                                                           | 69714  | 5.05 | 83            | 3               | 3                |
| VP13C_HUMAN | Vacuolar protein sorting-associated protein 13C                      | 422124 | 6.38 | 37            | 1               | 1                |
| VPS45_HUMAN | Vacuolar protein sorting-associated protein 45                       | 65036  | 8.41 | 46            | 3               | 1                |
| VPS8_HUMAN  | Vacuolar protein sorting-associated protein 8 homolog                | 161754 | 5.41 | 40            | 1               | 1                |
| VTDB_HUMAN  | Vitamin D-binding protein                                            | 52929  | 5.32 | 2744          | 93              | 25               |
| PROC_HUMAN  | Vitamin K-dependent protein C                                        | 52037  | 5.85 | 54            | 1               | 1                |
| PROS_HUMAN  | Vitamin K-dependent protein S                                        | 75074  | 5.48 | 78            | 3               | 3                |
| PROZ_HUMAN  | Vitamin K-dependent protein Z                                        | 44715  | 5.64 | 56            | 1               | 1                |

Table SII. Continued.

| Names       | Description                                       | MW, Da | pI    | Protein score | Peptide matches | Unique sequences |
|-------------|---------------------------------------------------|--------|-------|---------------|-----------------|------------------|
| VTNC_HUMAN  | Vitronectin                                       | 54271  | 5.55  | 566           | 20              | 9                |
| CCG6_HUMAN  | Voltage-dependent calcium channel gamma-6 subunit | 28129  | 9.40  | 36            | 1               | 1                |
| LRC8B_HUMAN | Volume-regulated anion channel subunit LRRC8B     | 92330  | 6.40  | 40            | 1               | 1                |
| VWF_HUMAN   | von Willebrand factor                             | 309058 | 5.29  | 90            | 3               | 3                |
| CAHD1_HUMAN | VWFA and cache domain-containing protein 1        | 142198 | 5.97  | 35            | 1               | 1                |
| WDR17_HUMAN | WD repeat-containing protein 17                   | 147703 | 6.01  | 39            | 1               | 1                |
| WDR60_HUMAN | WD repeat-containing protein 60                   | 122496 | 6.88  | 35            | 1               | 1                |
| WDR87_HUMAN | WD repeat-containing protein 87                   | 332975 | 6.94  | 40            | 1               | 1                |
| YETS4_HUMAN | YEATS domain-containing protein 4                 | 26483  | 8.40  | 35            | 1               | 1                |
| ZSC22_HUMAN | Zinc finger and SCAN domain-containing protein 22 | 54561  | 7.36  | 36            | 1               | 1                |
| ZBED5_HUMAN | Zinc finger BED domain-containing protein 5       | 78911  | 8.57  | 37            | 1               | 1                |
| ZC3H3_HUMAN | Zinc finger CCCH domain-containing protein 3      | 101941 | 10.95 | 37            | 1               | 1                |
| ZMYM1_HUMAN | Zinc finger MYM-type protein 1                    | 128717 | 7.51  | 35            | 1               | 1                |
| ZN101_HUMAN | Zinc finger protein 101                           | 50307  | 9.67  | 39            | 1               | 1                |
| ZN107_HUMAN | Zinc finger protein 107                           | 90614  | 9.43  | 36            | 1               | 1                |
| ZN223_HUMAN | Zinc finger protein 223                           | 55763  | 9.04  | 49            | 2               | 1                |
| ZN267_HUMAN | Zinc finger protein 267                           | 87320  | 9.14  | 37            | 1               | 1                |
| ZEP1_HUMAN  | Zinc finger protein 40                            | 296681 | 7.98  | 36            | 1               | 1                |
| ZN469_HUMAN | Zinc finger protein 469                           | 410202 | 7.88  | 39            | 1               | 1                |
| ZNF48_HUMAN | Zinc finger protein 48                            | 67777  | 9.51  | 52            | 2               | 1                |
| ZNF57_HUMAN | Zinc finger protein 57                            | 64385  | 9.06  | 38            | 1               | 1                |
| ZN578_HUMAN | Zinc finger protein 578                           | 68531  | 9.19  | 36            | 1               | 1                |
| ZN672_HUMAN | Zinc finger protein 672                           | 50192  | 10.01 | 43            | 1               | 1                |
| ZA2G_HUMAN  | Zinc-alpha-2-glycoprotein                         | 34237  | 5.71  | 774           | 24              | 12               |

MW, molecular weight; pI, isoelectric point.

Table SIII. Discriminatory ability of combined marker models. Models were constructed using a binary logistic regression model and the AUC of all possible combinations of markers were calculated. Comparisons between N- vs. E, N- vs. L, N+ vs. E, N+ vs. L, N+ vs. E, N+ vs. L, N- vs. E, N- vs. L, N+ vs. E, N+ vs. L groups are presented.

| Model No. | No. Markers | AUC      |          |          |          |          |          |          |              |          |              |              |         |
|-----------|-------------|----------|----------|----------|----------|----------|----------|----------|--------------|----------|--------------|--------------|---------|
|           |             | Marker 1 | Marker 2 | Marker 3 | Marker 4 | Marker 5 | Marker 6 | N- vs. E | N- vs. L     | N+ vs. E | N+ vs. L     | N- vs. N+    | E vs. L |
| 1         | 1           | AIAT     |          |          |          |          |          | 0.604    | 0.921        | 0.798    | 0.944        | 0.857        | 0.863   |
| 2         | 1           |          | PYCR2    |          |          |          |          | 0.637    | 0.683        | 0.673    | 0.958        | 0.696        | 0.915   |
| 3         | 1           |          |          | TTR      |          |          |          | 0.550    | 0.873        | 0.596    | 0.750        | 0.732        | 0.803   |
| 4         | 1           |          |          |          | ApoA-I   |          |          | 0.890    | 0.952        | 0.644    | 0.750        | 0.875        | 0.641   |
| 5         | 1           |          |          |          |          | VDBP     |          | 0.824    | 0.825        | 0.577    | 0.556        | 0.768        | 0.539   |
| 6         | 1           |          |          |          |          |          | MMRN1    | 0.978    | 0.889        | 0.548    | 0.764        | <b>0.982</b> | 0.752   |
| 7         | 2           | AIAT     | PYCR2    |          |          |          |          | 0.648    | 0.762        | 0.760    | 0.778        | 0.857        | 0.590   |
| 8         | 2           | AIAT     |          | TTR      |          |          |          | 0.571    | 0.921        | 0.798    | 0.931        | 0.607        | 0.880   |
| 9         | 2           | AIAT     |          |          | ApoA-I   |          |          | 0.890    | <b>1.000</b> | 0.769    | 0.944        | 0.643        | 0.829   |
| 10        | 2           | AIAT     |          |          |          | VDBP     |          | 0.824    | 0.889        | 0.740    | 0.833        | 0.679        | 0.684   |
| 11        | 2           | AIAT     |          |          |          |          | MMRN1    | 0.967    | <b>1.000</b> | 0.798    | 0.917        | 0.714        | 0.735   |
| 12        | 2           |          | PYCR2    | TTR      |          |          |          | 0.648    | 0.857        | 0.664    | 0.903        | 0.679        | 0.906   |
| 13        | 2           |          | PYCR2    |          | ApoA-I   |          |          | 0.890    | 0.952        | 0.692    | 0.972        | 0.554        | 0.889   |
| 14        | 2           |          | PYCR2    |          |          | VDBP     |          | 0.857    | 0.873        | 0.712    | 0.847        | 0.607        | 0.675   |
| 15        | 2           |          | PYCR2    |          |          |          | MMRN1    | 0.967    | 0.873        | 0.692    | 0.833        | 0.714        | 0.744   |
| 16        | 2           |          |          | TTR      | ApoA-I   |          |          | 0.901    | 0.603        | 0.740    | 0.625        | 0.536        | 0.838   |
| 17        | 2           |          |          | TTR      |          | VDBP     |          | 0.945    | 0.651        | 0.692    | 0.639        | 0.750        | 0.932   |
| 18        | 2           |          |          | TTR      |          |          | MMRN1    | 0.967    | 0.683        | 0.625    | 0.819        | 0.839        | 0.872   |
| 19        | 2           |          |          |          | ApoA-I   | VDBP     |          | 0.934    | 0.651        | 0.510    | 0.597        | 0.643        | 0.607   |
| 20        | 2           |          |          |          | ApoA-I   |          | MMRN1    | 0.967    | 0.619        | 0.539    | 0.847        | 0.857        | 0.761   |
| 21        | 2           |          |          |          |          | VDBP     | MMRN1    | 0.967    | 0.667        | 0.587    | 0.764        | <b>0.982</b> | 0.573   |
| 22        | 3           | AIAT     | PYCR2    | TTR      |          |          |          | 0.659    | 0.921        | 0.750    | 0.931        | 0.571        | 0.906   |
| 23        | 3           | AIAT     | PYCR2    |          | ApoA-I   |          |          | 0.890    | <b>1.000</b> | 0.760    | <b>1.000</b> | 0.536        | 0.897   |
| 24        | 3           | AIAT     | PYCR2    |          |          | VDBP     |          | 0.802    | 0.889        | 0.750    | 0.833        | 0.589        | 0.692   |
| 25        | 3           | AIAT     | PYCR2    |          |          |          | MMRN1    | 0.912    | <b>1.000</b> | 0.760    | 0.931        | 0.786        | 0.744   |
| 26        | 3           | AIAT     |          | TTR      | ApoA-I   |          |          | 0.901    | 0.873        | 0.808    | 0.972        | 0.554        | 0.880   |
| 27        | 3           | AIAT     |          | TTR      |          | VDBP     |          | 0.890    | 0.905        | 0.760    | 0.931        | 0.732        | 0.932   |
| 28        | 3           | AIAT     |          | TTR      |          |          | MMRN1    | 0.967    | <b>1.000</b> | 0.750    | 0.931        | 0.875        | 0.880   |
| 29        | 3           | AIAT     |          |          | ApoA-I   | VDBP     |          | 0.945    | <b>1.000</b> | 0.798    | 0.958        | 0.661        | 0.829   |
| 30        | 3           | AIAT     |          |          | ApoA-I   |          | MMRN1    | 0.967    | <b>1.000</b> | 0.779    | 0.958        | 0.857        | 0.829   |
| 31        | 3           | AIAT     |          |          |          | VDBP     | MMRN1    | 0.879    | <b>1.000</b> | 0.760    | 0.931        | 0.696        | 0.658   |
| 32        | 3           |          | PYCR2    | TTR      | ApoA-I   |          |          | 0.791    | 0.952        | 0.731    | 0.958        | 0.607        | 0.906   |
| 33        | 3           |          | PYCR2    | TTR      |          | VDBP     |          | 0.945    | 0.857        | 0.692    | 0.917        | 0.786        | 0.949   |

Table SIII. Continued.

| Model No. | No. Markers | AUC      |          |          |          |          |          |              |              |              |              |           |              |
|-----------|-------------|----------|----------|----------|----------|----------|----------|--------------|--------------|--------------|--------------|-----------|--------------|
|           |             | Marker 1 | Marker 2 | Marker 3 | Marker 4 | Marker 5 | Marker 6 | N- vs. E     | N- vs. L     | N+ vs. E     | N+ vs. L     | N- vs. N+ | E vs. L      |
| 34        | 3           |          | PYCR2    | TTR      |          |          | MMRN1    | 0.890        | 0.921        | 0.683        | 0.944        | 0.839     | 0.897        |
| 35        | 3           |          | PYCR2    |          | ApoA-I   | VDBP     |          | 0.681        | 0.952        | 0.702        | 0.944        | 0.679     | 0.932        |
| 36        | 3           |          | PYCR2    |          | ApoA-I   |          | MMRN1    | 0.791        | 0.952        | 0.692        | 0.972        | 0.857     | 0.915        |
| 37        | 3           |          | PYCR2    |          |          | VDBP     | MMRN1    | 0.835        | 0.905        | 0.760        | 0.833        | 0.696     | 0.778        |
| 38        | 3           |          |          | TTR      | ApoA-I   | VDBP     |          | <b>1.000</b> | 0.635        | 0.808        | 0.681        | 0.786     | 0.932        |
| 39        | 3           |          |          | TTR      | ApoA-I   |          | MMRN1    | 0.835        | 0.683        | 0.740        | 0.889        | 0.929     | 0.880        |
| 40        | 3           |          |          | TTR      |          | VDBP     | MMRN1    | <b>1.000</b> | 0.667        | 0.683        | 0.833        | 0.929     | 0.915        |
| 41        | 3           |          |          |          | ApoA-I   | VDBP     | MMRN1    | 0.769        | 0.667        | 0.596        | 0.889        | 0.875     | 0.752        |
| 42        | 4           | AIAT     | PYCR2    | TTR      | ApoA-I   |          |          | 0.857        | <b>1.000</b> | 0.817        | <b>1.000</b> | 0.589     | 0.906        |
| 43        | 4           | AIAT     | PYCR2    | TTR      |          | VDBP     |          | 0.912        | 0.889        | 0.731        | 0.944        | 0.804     | 0.949        |
| 44        | 4           | AIAT     | PYCR2    | TTR      |          |          | MMRN1    | 0.945        | <b>1.000</b> | 0.779        | 0.944        | 0.875     | 0.880        |
| 45        | 4           | AIAT     | PYCR2    |          | ApoA-I   | VDBP     |          | 0.780        | <b>1.000</b> | 0.817        | <b>1.000</b> | 0.661     | 0.932        |
| 46        | 4           | AIAT     | PYCR2    |          | ApoA-I   |          | MMRN1    | 0.923        | <b>1.000</b> | 0.798        | <b>1.000</b> | 0.875     | 0.906        |
| 47        | 4           | AIAT     | PYCR2    |          |          | VDBP     | MMRN1    | 0.835        | 0.952        | 0.721        | 0.986        | 0.875     | 0.983        |
| 48        | 4           | AIAT     |          | TTR      | ApoA-I   | VDBP     |          | <b>1.000</b> | <b>1.000</b> | 0.914        | 0.972        | 0.821     | 0.932        |
| 49        | 4           | AIAT     |          | TTR      | ApoA-I   |          | MMRN1    | 0.978        | <b>1.000</b> | 0.846        | 0.972        | 0.911     | 0.897        |
| 50        | 4           | AIAT     |          | TTR      |          | VDBP     | MMRN1    | <b>1.000</b> | <b>1.000</b> | 0.769        | 0.931        | 0.946     | 0.932        |
| 51        | 4           | AIAT     |          |          | ApoA-I   | VDBP     | MMRN1    | 0.868        | <b>1.000</b> | 0.798        | 0.958        | 0.875     | 0.829        |
| 52        | 4           |          | PYCR2    | TTR      | ApoA-I   | VDBP     |          | <b>1.000</b> | 0.952        | 0.846        | 0.944        | 0.804     | 0.949        |
| 53        | 4           |          | PYCR2    | TTR      | ApoA-I   |          | MMRN1    | 0.901        | 0.952        | 0.721        | 0.972        | 0.929     | 0.897        |
| 54        | 4           |          | PYCR2    | TTR      |          | VDBP     | MMRN1    | <b>1.000</b> | 0.921        | 0.760        | 0.917        | 0.911     | 0.983        |
| 55        | 4           |          |          | TTR      | ApoA-I   | VDBP     | MMRN1    | <b>1.000</b> | 0.698        | 0.856        | 0.889        | 0.946     | 0.932        |
| 56        | 5           | AIAT     | PYCR2    | TTR      | ApoA-I   | VDBP     |          | <b>1.000</b> | <b>1.000</b> | 0.923        | <b>1.000</b> | 0.821     | 0.949        |
| 57        | 5           | AIAT     | PYCR2    | TTR      | ApoA-I   |          | MMRN1    | 0.956        | <b>1.000</b> | 0.865        | <b>1.000</b> | 0.911     | 0.889        |
| 58        | 5           | AIAT     |          | TTR      | ApoA-I   | VDBP     | MMRN1    | <b>1.000</b> | <b>1.000</b> | 0.904        | 0.986        | 0.946     | 0.940        |
| 59        | 5           | AIAT     | PYCR2    |          | ApoA-I   | VDBP     | MMRN1    | 0.956        | <b>1.000</b> | 0.798        | <b>1.000</b> | 0.875     | 0.974        |
| 60        | 5           | AIAT     | PYCR2    | TTR      |          | VDBP     | MMRN1    | <b>1.000</b> | <b>1.000</b> | 0.750        | 0.986        | 0.946     | 0.983        |
| 61        | 5           |          | PYCR2    | TTR      | ApoA-I   | VDBP     | MMRN1    | <b>1.000</b> | 0.952        | 0.846        | 0.986        | 0.946     | 0.983        |
| 62        | 6           | AIAT     | PYCR2    | TTR      | ApoA-I   | VDBP     | MMRN1    | <b>1.000</b> | <b>1.000</b> | <b>0.933</b> | <b>1.000</b> | 0.929     | <b>0.992</b> |

Values in bold indicates the best panel marker(s) for diagnosis of each paired sample comparison. AUC, area under the ROC curve; CI, confidence interval; AIAT,  $\alpha$ -1-antitrypsin; PYCR2, pyrroline-5-carboxylate reductase 2; TTR, transthyretin; ApoA-I, apolipoprotein A-I; VDBP, vitamin D binding protein; MMRN1, multimerin-1; N- vs. E, normal with HPV-negative vs. early stage; N- vs. L, normal with HPV negative vs. late stage; N+ vs. E, normal with HPV-positive vs. early stage; N+ vs. N+, normal with HPV-negative vs. normal with HPV-positive; E vs. L, early stage vs. late stage cervical cancer.
